# Supplementary material
Source: PubMed Central journal article supplement (PMC4850241)
Supplement: mmc2.pdf [file mmc2.pdf]

# Regulation of PI3K by PKC and MARCKS: Single-Molecule Analysis of a Reconstituted Signaling Pathway

Brian P. Ziemba,<sup>1,2</sup> John E. Burke,<sup>3</sup> Glenn Masson,<sup>3</sup> Roger L. Williams,<sup>3</sup> and Joseph J. Falke<sup>1,2,\*</sup>

<sup>1</sup>Molecular Biophysics Program and <sup>2</sup>Department of Chemistry and Biochemistry, University of Colorado, Boulder, Colorado; and <sup>3</sup>Medical Research Council Laboratory of Molecular Biology, Cambridge, United Kingdom

**ABSTRACT** In chemotaxing ameboid cells, a complex leading-edge signaling circuit forms on the cytoplasmic leaflet of the plasma membrane and directs both actin and membrane remodeling to propel the leading edge up an attractant gradient. This leading-edge circuit includes a putative amplification module in which  $\text{Ca}^{2+}$ -protein kinase C ( $\text{Ca}^{2+}$ -PKC) is hypothesized to phosphorylate myristoylated alanine-rich C kinase substrate (MARCKS) and release phosphatidylinositol-4,5-bisphosphate ( $\text{PIP}_2$ ), thereby stimulating production of the signaling lipid phosphatidylinositol-3,4,5-trisphosphate ( $\text{PIP}_3$ ) by the lipid kinase phosphoinositide-3-kinase (PI3K). We investigated this hypothesized  $\text{Ca}^{2+}$ -PKC-MARCKS- $\text{PIP}_2$ -PI3K- $\text{PIP}_3$  amplification module and tested its key predictions using single-molecule fluorescence to measure the surface densities and activities of its protein components. Our findings demonstrate that together  $\text{Ca}^{2+}$ -PKC and the  $\text{PIP}_2$ -binding peptide of MARCKS modulate the level of free  $\text{PIP}_2$ , which serves as both a docking target and substrate lipid for PI3K. In the off state of the amplification module, the MARCKS peptide sequesters  $\text{PIP}_2$  and thereby inhibits PI3K binding to the membrane. In the on state,  $\text{Ca}^{2+}$ -PKC phosphorylation of the MARCKS peptide reverses the  $\text{PIP}_2$  sequestration, thereby releasing multiple  $\text{PIP}_2$  molecules that recruit multiple active PI3K molecules to the membrane surface. These findings 1) show that the  $\text{Ca}^{2+}$ -PKC-MARCKS- $\text{PIP}_2$ -PI3K- $\text{PIP}_3$  system functions as an activation module *in vitro*, 2) reveal the molecular mechanism of activation, 3) are consistent with available *in vivo* data, and 4) yield additional predictions that are testable in live cells. More broadly, the  $\text{Ca}^{2+}$ -PKC-stimulated release of free  $\text{PIP}_2$  may well regulate the membrane association of other  $\text{PIP}_2$ -binding proteins, and the findings illustrate the power of single-molecule analysis to elucidate key dynamic and mechanistic features of multiprotein signaling pathways on membrane surfaces.

## INTRODUCTION

At the leading edge of chemotaxing ameboid cells, an exquisitely sensitive, robust signaling circuit composed of dozens of signaling proteins forms on the cytoplasmic leaflet of the plasma membrane (1–5). This leading-edge circuit receives inputs from chemoreceptors that detect chemical attractants and uses this information to direct the net growth of the leading edge up the attractant concentration gradient. To achieve this directed movement, both the local actin mesh and the plasma membrane must be remodeled by the circuit outputs.

Extensive evidence indicates that in professional chemotaxing cells, including macrophages and neutrophils that

follow chemical trails to sites of infection and tissue damage, the leading-edge circuit includes a positive-feedback loop (1,2,5–9). In this feedback loop, it is observed that stimulation (or inhibition) of any single component activates (or inhibits) all other components. The positive feedback is proposed to maintain the stability and sensitivity of the leading-edge circuit even in the absence of attractant, ensuring a rapid response to a new or rapidly changing attractant gradient. Moreover, positive feedback may play a central role in the compass that determines the direction of movement. Components of the positive-feedback loop identified thus far include phosphoinositide-3-kinase (PI3K) and its product signaling lipid phosphatidylinositol-3,4,5-trisphosphate ( $\text{PIP}_3$ ), filamentous actin (F-actin), and Rho/Rac GTPases.

In addition to PI3K- $\text{PIP}_3$ , F-actin, and Rho/Rac, studies of the macrophage leading edge have implicated both leading-edge  $\text{Ca}^{2+}$  and a conventional protein kinase C (PKC) isoform (specifically, PKC $\alpha$ ) as essential players in the

Submitted October 30, 2015, and accepted for publication March 7, 2016.

\*Correspondence: falke@colorado.edu

John E. Burke's present address is Department of Biochemistry and Microbiology, University of Victoria, Victoria, British Columbia, Canada.

Editor: Arne Gericke.

<http://dx.doi.org/10.1016/j.bpj.2016.03.001>

© 2016 Biophysical Society

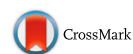

positive-feedback loop (2,7). Thus, in RAW 264.7 mouse macrophages, stimulation of the  $\text{Ca}^{2+}$  signal triggers increased  $\text{PIP}_3$  production at the leading edge, whereas blockage of the  $\text{Ca}^{2+}$  signal yields decreased  $\text{PIP}_3$  production at the leading edge. In other cell types, the link between  $\text{Ca}^{2+}$ , PKC, and positive feedback has not yet been established, but leading-edge  $\text{Ca}^{2+}$  signals have been detected in multiple cell types (9–13).

To explain the mechanistic roles of  $\text{Ca}^{2+}$  and PKC in positive feedback, it has been hypothesized that  $\text{Ca}^{2+}$ -activated PKC activates PI3K by increasing the availability of phosphatidylinositol-4,5-bisphosphate ( $\text{PIP}_2$ ), which serves as both a docking target and substrate lipid for PI3K (2,7). In cells, the myristoylated alanine-rich C kinase substrate (MARCKS) protein is known to sequester a significant fraction of plasma membrane  $\text{PIP}_2$  via the tight association of its disordered, basic  $\text{PIP}_2$ -binding region with up to four  $\text{PIP}_2$  molecules (14–18). The working hypothesis (2,7) predicts that such sequestration of  $\text{PIP}_2$  by MARCKS will inhibit the net lipid kinase activity of PI3K either by slowing its  $\text{PIP}_2$ -specific membrane targeting reaction, thereby reducing the density of PI3K molecules on the membrane surface, or by reducing the lipid kinase activity of membrane-bound PI3K molecules due to the decreased availability of  $\text{PIP}_2$  substrate lipid. The resulting PI3K inhibition by  $\text{PIP}_2$  sequestration is predicted to be reversed by the action of PKC, which is known to phosphorylate the MARCKS  $\text{PIP}_2$ -binding region at up to three sites, thereby reducing its  $\text{PIP}_2$  binding capacity (14,15,19–23). Fig. 1 illustrates the flow of information through the hypothesized  $\text{Ca}^{2+}$ -PKC-MARCKS- $\text{PIP}_2$ -PI3K- $\text{PIP}_3$  amplification module.

Here, we test the prediction (2,7) that the upstream  $\text{Ca}^{2+}$ -PKC-MARCKS- $\text{PIP}_2$  section of the putative amplification

module can regulate PI3K activity and  $\text{PIP}_3$  production on a target membrane surface. We used single-molecule fluorescence to monitor the surface density, diffusion speed, and enzyme activity of the key protein and lipid components in a reconstituted, four-protein signaling module. The module employs active full-length  $\text{PKC}\alpha$ , the isolated  $\text{PIP}_2$ -binding peptide of MARCKS, the lipid  $\text{PIP}_2$ , active full-length phosphoinositide-3-kinase isoform  $\alpha$  ( $\text{PI3K}\alpha$ ), and a pleckstrin homology (PH) domain that is used as a  $\text{PIP}_3$  sensor to detect every molecule of  $\text{PIP}_3$  produced by  $\text{PI3K}\alpha$ .

Our findings reveal that, as predicted, the MARCKS  $\text{PIP}_2$ -binding peptide decreases the net lipid kinase activity of  $\text{PI3K}\alpha$ , specifically by inhibiting the membrane targeting of the lipid kinase. Moreover, as predicted, phosphorylation of the MARCKS  $\text{PIP}_2$ -binding peptide by  $\text{PKC}\alpha$  triggers partial dissociation from the membrane, thereby releasing sequestered  $\text{PIP}_2$  and restoring  $\text{PI3K}\alpha$  membrane binding and lipid kinase activity. Overall, the findings directly demonstrate that the  $\text{Ca}^{2+}$ -PKC- $\text{MARCKS}$ - $\text{PIP}_2$  system can regulate the net lipid kinase activity of  $\text{PI3K}\alpha$  in a near-physiological reconstituted system *in vitro*, providing a simple molecular explanation for the  $\text{Ca}^{2+}$ -activated stimulation of  $\text{PIP}_3$  production that was previously observed at the leading edge of macrophages (6). More broadly, the  $\text{Ca}^{2+}$ -PKC-MARCKS- $\text{PIP}_2$ -PI3K- $\text{PIP}_3$  amplification module may also play central roles in other signaling pathways wherein the module components are known to colocalize. This would include oncogenic pathways, since PKC and PI3K are master kinases that regulate cell growth and apoptosis, and their overexpression or superactivation by oncogenic mutations is linked to an array of human cancers (24–30).

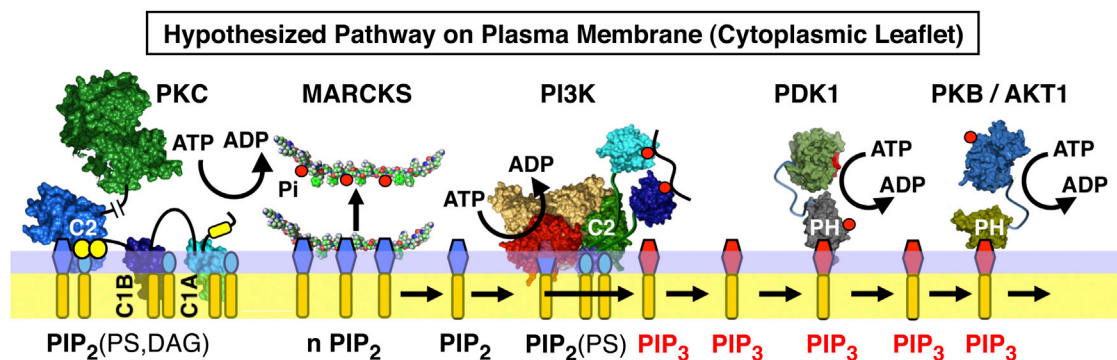

FIGURE 1 Working model for the hypothesized  $\text{Ca}^{2+}$ -PKC-MARCKS- $\text{PIP}_2$ -PI3K- $\text{PIP}_3$  amplification circuit at the leading-edge membrane of a chemotaxing macrophage. Shown are PKC and PI3K with their effector lipids and proteins on the cytoplasmic leaflet of the leading-edge membrane (2,7,115). Active PKC is bound via its  $\text{Ca}^{2+}$ -occupied C2 domain to  $\text{PIP}_2$  (specifically PS and  $\text{PI}(4,5)\text{P}_2$ ), and via its C1A and C1B domains to PS and DAG. This active PKC is proposed to phosphorylate the  $\text{PIP}_2$ -binding region of MARCKS (shown here as the isolated peptide,  $\text{MARCKS}_p$ ), thereby releasing  $\text{PIP}_2$  from MARCKS and increasing the local free  $\text{PIP}_2$  density. The newly released  $\text{PIP}_2$  molecules are hypothesized to activate the lipid kinase PI3K, since  $\text{PIP}_2$  serves as both a target and substrate lipid for PI3K, which phosphorylates the  $\text{PIP}_2$  to generate the signaling lipid  $\text{PIP}_3$  (specifically  $\text{PI}(3,4,5)\text{P}_3$ ). In turn, the  $\text{PIP}_3$  recruits an array of signaling proteins possessing PH domains, including PDK1 and PKB/AKT1, to the leading-edge membrane, where they participate in the signaling network that controls the expansion of the leading edge up an attractant gradient. Lipid identities are indicated by headgroup symbols: red hexagon is  $\text{PIP}_3$ , blue hexagon is  $\text{PIP}_2$ , small blue oval is PS, no headgroup is DAG. To see this figure in color, go online.

## MATERIALS AND METHODS

### Reagents

Synthetic dioleoyl phospholipids (phosphatidylcholine (PC); 1,2-dioleoyl-*sn*-glycero-3-phosphocholine), phosphatidylserine (PS); 1,2-dioleoyl-*sn*-glycero-3-phospho-L-serine), 1,2-dioleoyl-*sn*-glycero-3-phosphoinositol-4,5-diphosphate (PIP<sub>2</sub>), diacylglycerol (DAG); 1,2-dioleoyl-*sn*-glycerol), 1,2-dioleoyl-*sn*-glycero-3-phosphoethanolamine (PE)), and 1,2-dioleoyl-*sn*-glycero-3-phosphoethanolamine-N-[lissamine rhodamine B sulfonyl] (LRB-PE)) and natural lipids (cholesterol (Chol, ovine, >98%) and sphingomyelin (SPM, porcine brain, >99%)) were obtained from Avanti Polar Lipids (Alabaster, AL). Alexa Fluor 555 C<sub>2</sub>-maleimide (AF555) and CoverWell perfusion chambers were obtained from Invitrogen (Carlsbad, CA). Glass supports were obtained from Ted Pella (Redding, CA). 2-Mercaptoethanol, ultrapure (>99%) bovine serum albumin (BSA), ATP magnesium salt, and CoA trilithium salt were obtained from Sigma (St. Louis, MO). Anti-hemagglutinin (anti-HA) agarose affinity resin and HA peptide were obtained from Thermo Scientific (Rockford, IL). Amylose affinity resin was obtained from New England Biolabs (Ipswich, MA). Glutathione sepharose 4B was obtained from GE Healthcare Bio-Sciences (Piscataway, NJ). The biphosphorylated phosphopeptide (pY<sub>2</sub>) was derived from mouse PDGFR (sequence 735-ESDGGpY(740)MDMSKDESIDpY(751)VPMLDMKGDYADIE-767) and produced by Cambridge Peptides (Birmingham, UK). Ultrapure (≥99%) 3-[(3 cholamidopropyl)dimethylammonio]-1-propanesulfonate (CHAPS) was obtained from Anatrace (Maumee, OH). Complete, EDTA-free protease inhibitor tablets were obtained from Roche (Indianapolis, IN). Human MARCKS PIP<sub>2</sub> binding domain (MARCKS residues 151–175) was fabricated by SynBioSci (Livermore, CA) and includes an N-terminal cysteine residue added for probe labeling (n-CKKKKKRFRSFKKLSGFSFKKKNK-c).

### PKC $\alpha$ cloning and expression

As previously described (31), PKC $\alpha$  was generated by tissue culture expression and purification of a full-length, functional human PKC $\alpha$  construct possessing an 11-residue recognition sequence (ybbR) for enzymatic labeling with a CoA-linked fluorophore (see below) by Sfp phosphopantetheinyltransferase (32). The ybbR labeling tag was inserted between the kinase domain and a C-terminal HA tag. Final PKC $\alpha$ -containing fractions in PKC storage buffer (20 mM HEPES (pH 7.5), 100 mM NaCl, 0.1 mM EDTA, 25% glycerol, 1 mM dithiothreitol) were collected and concentrated to 12  $\mu$ M, and then snap-frozen in 100  $\mu$ L aliquots using liquid nitrogen.

### PI3K $\alpha$ cloning and expression

The PI3K $\alpha$  construct utilized in this study was generated by cloning the human PI3K p110 $\alpha$  catalytic and PI3K p85 $\alpha$  regulatory subunits into the pFastbacHT vector (Invitrogen), which encodes an N-terminal His<sub>6</sub>-tag and a TEV protease cleavage site and the pFastbac1 vector (Invitrogen), respectively, as previously described (33). Subsequently, an 11-amino acid ybbR labeling peptide (sequence DSLEFIASKLA) (32) was inserted at the N-terminus of the *Homo sapiens* PI3K p85 $\alpha$  regulatory subunit, generating an N-terminal enzymatic labeling tag. This construct was used to express full-length, functional p85 $\alpha$ /p110 $\alpha$  heterodimer (PI3K $\alpha$ ) in *Spodoptera frugiperda* (Sf9) insect cells and purified as previously described (33). Final PI3K $\alpha$ -containing fractions in PI3K storage buffer (20 mM HEPES pH 7.2, 125 mM NaCl, 10% glycerol, 4 mM tris(2-carboxyethyl)phosphine) (TCEP), 0.05% CHAPS) were collected and concentrated to 11  $\mu$ M, and then snap-frozen in 20  $\mu$ L aliquots using liquid nitrogen.

### GRP1 PH domain cloning and expression

A human GRP1 PH domain construct possessing an N-terminal ybbR enzymatic labeling tag was created and purified as previously described (34).

Final PH-domain-containing fractions in GRP-PH storage buffer (50 mM TRIS pH 7.5, 15 mM NaCl, 2.5 mM CaCl<sub>2</sub>) were collected and concentrated to 80  $\mu$ M, and then snap-frozen in 100  $\mu$ L aliquots using liquid nitrogen.

### Labeling of PI3K, PKC, GRP, and MARCKS with fluorophore

Recombinant PKC $\alpha$ , PI3K $\alpha$ , and GRP1-PH proteins were covalently modified with the fluorophore AF555 by the Sfp enzyme using a published protocol (31,34). Specifically, ~2  $\mu$ M target protein was incubated with 2.5  $\mu$ M Alexa Fluor 555-CoA conjugate, 0.5  $\mu$ M Sfp, and 50  $\mu$ M Mg<sup>2+</sup> in the storage buffer of that protein at room temperature for 60 min (except for PI3K $\alpha$ , which was incubated for 30 min on ice). Excess fluorophore was removed by buffer exchange with storage buffer using Vivaspin concentrators (Sartorius Stedim, Göttingen, Germany) until the flow-through was not visibly colored by AF555 fluorophore, and the final flow-through was checked for absorbance at 555 nm to ensure complete removal of free label. The labeling efficiency and concentration of labeled protein were determined from the measured absorbances of AF555 and intrinsic tryptophan residues. Labeled protein was concentrated to 11  $\mu$ M in its storage buffer and then aliquoted and snap-frozen in 10  $\mu$ L aliquots using liquid nitrogen. No perturbations due to the Alexa Fluor 555 label were detected, with one exception: although labeled PI3K $\alpha$  exhibited native lipid specificity (see Results), it was found to possess lower enzyme activity than the unlabeled protein, and thus unlabeled PI3K $\alpha$  was routinely employed in lipid kinase assays (see Results).

The MARCKS PIP<sub>2</sub>-binding domain was labeled by incubating ~1  $\mu$ M target peptide and 1.5  $\mu$ M AF555-maleimide in the presence of 1  $\mu$ M TCEP at room temperature for 1 h. Free fluorophore was removed from each MARCKS labeling reaction via exchange with total internal reflection fluorescence (TIRF) assay buffer (see below) using Amicon (Millipore, Billerica, MA) Ultra 3 kDa centrifugal filters.

Before activity or TIRF measurements were obtained, labeled or unlabeled proteins were diluted into buffer containing stabilizers as needed and a low level of BSA to block sticky surfaces that could absorb the dilute proteins (35). Aliquots of PKC were thawed on ice and diluted into PKC storage buffer containing 100  $\mu$ g mL<sup>-1</sup> BSA. Ice-thawed aliquots of PI3K were diluted into a buffer that maximizes its stability (20 mM HEPES pH 7.2, 125 mM NaCl, 10% glycerol, 4 mM TCEP, 0.05% CHAPS, 100  $\mu$ g mL<sup>-1</sup> BSA). Ice-thawed aliquots of GRP1-PH and MARCKS were diluted into TIRF assay buffer (see below) containing 100  $\mu$ g mL<sup>-1</sup> BSA.

### Supported lipid bilayer preparation

Supported lipid bilayers were prepared from sonicated unilamellar vesicles as described previously (34,36). CHAPS (0.05%) was included in all experiments as it was found to stabilize PI3K activity and did not increase membrane-binding or lipid kinase activity in the absence of pY<sub>2</sub>.

### TIRF microscopy measurements

TIRF microscopy (TIRFM) experiments were carried out at 21.5  $\pm$  0.5°C on an objective-based TIRFM instrument as described previously (34,36). Supported bilayers were first washed with TIRF assay buffer (100 mM KCl, 20 mM HEPES pH 6.9, 15 mM NaCl, 5 mM glutathione, 2.0 mM EGTA, 1.9 mM Ca<sup>2+</sup>, 0.5 mM Mg<sup>2+</sup>; this Ca<sup>2+</sup>/Mg<sup>2+</sup> buffering system yields 10  $\mu$ M free Ca<sup>2+</sup> and 0.5 mM free Mg<sup>2+</sup>), and then a concentrated mixture of BSA and CHAPS was added to yield final concentrations of 100  $\mu$ g/mL and 0.05%, respectively. These final concentrations were maintained throughout the protein experiments. BSA was employed because it is a standard component in single-molecule supported bilayer studies, where it is known to block hydrophobic surface defects on the bilayer and chamber

surfaces, thereby preventing immobilization of hydrophobic fluorescent proteins at those defects without perturbing the lipids or proteins on normal bilayer surfaces (31,35). CHAPS was employed because it is known to significantly enhance the specific lipid kinase activity of PI3K and is one of the mild detergents that are routinely used in PI3K activity assays (33,37–39). Control experiments were carried out to examine the effect of CHAPS on the system described here. CHAPS had minimal effects on lipid diffusion in the bilayer, yielding only a small (<15%) but reproducible slowing of a fluorescent headgroup lipid or fluorescent GRP1 PH domain bound to a PIP<sub>3</sub> lipid headgroup (Fig. S1 A in the Supporting Material). Similarly, PKC protein kinase activity was not significantly altered by CHAPS (Fig. S1 B). In contrast, CHAPS decreased the surface density of membrane-bound PI3K by twofold (Fig. S1 C) and increased the total PI3K lipid kinase activity by twofold (Fig. S1 D), yielding an ~4-fold overall increase in the specific PI3K lipid kinase activity per membrane-bound molecule.

After BSA and CHAPS addition, the membranes were imaged by TIRFM. Typically, only a few dim, rapidly dissociating fluorescent contaminants were observed on the bilayer before protein addition and were easily eliminated from the data as described below. Occasionally, the contaminant level was excessive and the membranes (the usual source of contamination) were remade.

After minimal contamination was confirmed, proteins and ATP (1 mM) were added as needed and equilibrated for 5 min. To minimize contributions from small numbers of immobile unfolded proteins, a bleach pulse with ~30-fold higher power than that used for imaging was applied for ~10 s, and fluorescence was then allowed to return to a steady state for at least 60 s before data acquisition as previously described (34,36,40). This step minimizes the contributions of immobilized fluorescent particles permanently bound and membrane defects coated with BSA and fluorescent proteins. Bleaching has no effect on the new proteins that subsequently bind and exhibit all ranges of diffusion speed. For each sample, a set of two to four movie streams were acquired at a frame rate of 20 frames/s and a spatial resolution of 4.2 pixels/ $\mu\text{m}$  on an in-house-built instrument using NIS Elements Basic Research (Nikon, Melville, NY).

## Single-particle tracking

As in our previous studies (34,36,40), we tracked and quantitated the diffusion trajectories of single protein molecules using the Particle Tracker plugin for ImageJ (41), yielding a per-frame quantitation of particle position and brightness. The resulting data were then imported into *Mathematica* for further analysis. Only particles that possessed fluorescence intensities within a defined range were included in the analysis, thereby eliminating bright fluorescent contaminants/protein aggregates and dim, nonprotein contaminants. Additional displacement-based exclusions removed immobile particles, rapidly dissociating particles, and overlapping tracks for which particle identity was lost. All exclusions were described and validated previously (34,36,40).

## Determination of diffusion coefficients from single-molecule data

Each data set was analyzed with a one-component fit (MARCKS) or a two-component Rayleigh fit (PI3K), and the results were used to determine the population-weighted average diffusion coefficient as described previously (34).

## Membrane binding assays

To quantify the average density of a given protein on the membrane surface in a given TIRF movie, the number of single particle tracks (defined as described above) in a given field of view was determined for each movie frame and then averaged over all frames.

## Kinase assays

As described previously (31), bulk PKC kinase assays were performed with the PepTag Non-Radioactive Protein Kinase C system (Promega, Madison, WI) using the same sonicated unilamellar vesicle preparations employed for supported bilayers.

A new, to our knowledge, single-molecule kinase assay was developed to quantify the specific activity of PI3K $\alpha$ . To maintain constant levels of free ATP (1 mM), Mg<sup>2+</sup> (0.5 mM) and Ca<sup>2+</sup> (10  $\mu\text{M}$ ) in all assays, both the TIRF assay buffer (see above) and the ATP stock (TIRF assay buffer containing 100 mM ATP and 82.5 mM Mg<sup>2+</sup>) were buffered with EGTA as defined by MaxChelator (42). To determine the PI3K $\alpha$  specific activity, first the average density of PI3K $\alpha$  was determined via the binding assay described above (with appropriate correction for the PI3K fluorescence labeling efficiency). Second, to count all single molecules of product PIP<sub>3</sub> produced by the PI3K lipid kinase reaction, a saturating concentration of GRP-PH domain (500 pM) was employed to tag each PIP<sub>3</sub> molecule generated on the membrane surface with a fluorescent PH domain.

## Statistics

Error bars represent standard errors of the mean for  $n$  means (where the number of means is  $n = 5$ –15, and each mean is determined from four to eight movies), except where indicated otherwise. Statistical significance was examined using the appropriate test; most commonly, the two-tailed  $t$ -test was used to determine whether an event was statistically significant.

## RESULTS

### Physiological model system employed for single-molecule studies

To investigate the ability of PKC $\alpha$  and MARCKS to regulate PI3K $\alpha$  lipid kinase activity, we developed an in vitro model system that closely mimics key physiological features of this signaling network on the target plasma membrane during a cytoplasmic Ca<sup>2+</sup> signal. Full-length, functional constructs of the master kinases PKC $\alpha$  and PI3K $\alpha$  were employed, and the PIP<sub>2</sub>-binding region of the intrinsically disordered MARCKS protein was mimicked by a 26-residue synthetic peptide as schematically illustrated in Fig. 2. The chosen free protein concentrations (Table 1) closely approximated cellular protein levels, with the exception of the free PI3K $\alpha$  concentration, which was eightfold lower than physiological to allow quantitative measurement of its lipid kinase activity. However, the high concentration of diphospho-peptide employed to activate PI3K $\alpha$  in these studies is expected to partially offset this discrepancy by driving a higher fraction of PI3K $\alpha$  to the membrane than may occur in the cell. The ionic and ATP concentrations of the buffer employed were also near physiological (Table 1).

### Three protein constructs for single-molecule fluorescence studies

To prepare constructs for single-molecule TIRF, each protein was engineered so that it could be labeled with an Alexa 555 fluorophore. PKC $\alpha$  and PI3K $\alpha$  constructs possessed the

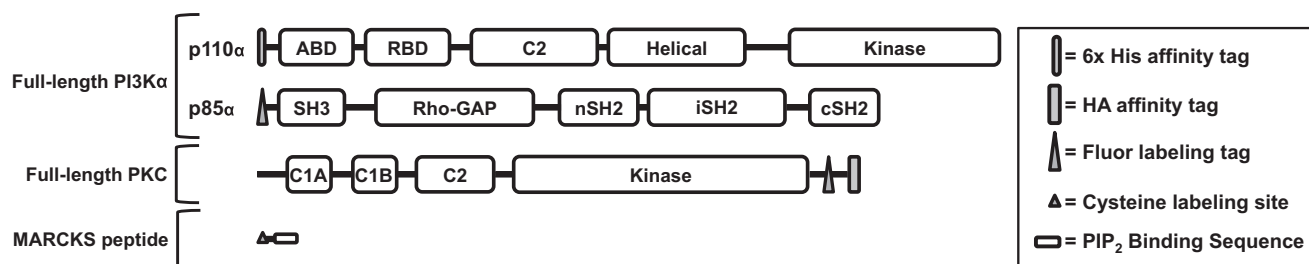

FIGURE 2 Modular representation of the protein constructs employed in this study. The full-length, heterodimeric construct of PI3K $\alpha$  possesses an N-terminal 6-His affinity purification tag on the p110 $\alpha$  catalytic subunit and an 11-residue, N-terminal enzymatic labeling tag on the p85 $\alpha$  regulatory subunit. The full-length construct of PKC $\alpha$  possesses the regulatory module (N-terminal pseudo substrate peptide and C1A-C1B-C2 domains), followed by the catalytic kinase domain, and finally an 11-residue enzymatic labeling tag and an HA affinity purification tag. The isolated peptide representing the PIP<sub>2</sub>-binding region of MARCKS includes MARCKS residues 151–175, preceded by an N-terminal cysteine as a chemical labeling site.

ybbR enzymatic labeling tag at or near a protein terminus to minimize effects on protein function, and this labeling tag was covalently modified with the fluorescent adduct CoA-Alexa Fluor 555 via a gentle enzymatic labeling reaction (32). The synthetic MARCKS peptide possessed a Cys sulfhydryl at the N-terminus that was chemically labeled with Alexa Fluor 555. In all cases, uncoupled fluorophore was removed by ultrafiltration, and functional tests showed that each protein bound to supported lipid bilayers with its characteristic, native lipid specificity (see below).

### Supported lipid bilayers

Supported lipid bilayers were assembled on a glass slide with a thin intervening buffer layer between the glass and the lower membrane leaflet (43–45), whereas the upper leaflet was exposed to bulk buffer to which proteins and other components were added (34,36). The resulting supported bilayer provided a flat, homogeneous surface for quantitative single-molecule TIRF studies of protein binding to the membrane, two-dimensional (2D) diffusion, and kinase activity.

The supported lipid bilayer utilized in most experiments was a simple lipid mixture containing the relevant back-

ground and signaling lipids of the plasma membrane inner leaflet at mole densities similar to their cellular levels. This mixture was PE/PS/DAG/PIP<sub>2</sub> 73:24:2:1 (mole percent). PE and PS are the single most prevalent background and anionic lipids of the inner leaflet, respectively (34,36), DAG is a signaling lipid that activates PKC $\alpha$  (31,46–49), and PI(4,5)P<sub>2</sub> (or PIP<sub>2</sub>) is involved in many signaling reactions (50) and is both a target and substrate lipid for PI3K $\alpha$  (31,33). The resulting homogeneous lipid bilayer possessed the minimal set of lipids needed to test the hypothesis that PKC $\alpha$  and/or MARCKS can modulate the lipid kinase activity of PI3K $\alpha$  during a physiological Ca<sup>2+</sup> signal.

### Quantifying the membrane-targeting lipid specificities of PKC $\alpha$ , MARCKS peptide, and PI3K $\alpha$

To quantitate membrane binding, a known total concentration of a given labeled protein was added to the bulk buffer phase above the supported bilayer, and single-molecule TIRF was employed to image the membrane-bound fluorescent proteins diffusing on the bilayer surface. Particle-tracking software was employed to analyze the 2D diffusion of each membrane-bound fluorescent protein molecule (see Materials and Methods), enabling quantitation of the density of particles that possessed the characteristic diffusion speed of that protein. As in our previous studies, this approach enabled a quantitative particle count of the native, membrane-bound protein of interest, as well as accurate exclusion of fluorescent contaminants and immobile, improperly folded proteins from the analysis (34,36). Notably, the imaging method detects only membrane-bound proteins that are diffusing orders of magnitude more slowly than free proteins in the aqueous phase owing to the high viscosity and frictional drag of the bilayer; free proteins diffuse much too fast to be detected by the imaging system and thus are ignored (34,36). Fig. 3 illustrates representative single-particle tracks for each fluorescent protein construct.

TABLE 1 Comparison of Intracellular Conditions with the Experimental Conditions Employed in Single-Molecule TIRF Measurements

|                              | In Vivo Conditions     | In Vitro Single-Molecule Experiment |
|------------------------------|------------------------|-------------------------------------|
| PKC                          | ~0.3 $\mu$ M (103–105) | 0.3 $\mu$ M                         |
| MARCKS                       | ~10 $\mu$ M (14,15)    | 20 $\mu$ M                          |
| PI3K                         | ~16 nM <sup>a</sup>    | 2 nM                                |
| ATP                          | ~1 mM (106)            | 1 mM                                |
| PIP <sub>2</sub>             | ~1% (107,108)          | 1%                                  |
| Na <sup>+</sup>              | 12 mM (109)            | 15 mM                               |
| K <sup>+</sup>               | 139 mM (109)           | 100 mM                              |
| Free Mg <sup>2+</sup>        | ~0.5 mM (110–112)      | 0.5 mM                              |
| Free, local Ca <sup>2+</sup> | 1–10 $\mu$ M (113,114) | 10 $\mu$ M                          |

<sup>a</sup>N. Tsolakos, P. Hawkins, and L. Stephens (Babraham Institute, Cambridgeshire, UK), personal communication.

To test the three fluorescent proteins for proper folding and membrane targeting, their lipid binding specificities were determined and compared with the known specificities of the native proteins. Membrane binding densities were quantified on standard PE/PS/DAG/PIP<sub>2</sub> supported bilayers and on simpler mixtures lacking specific lipids as summarized in Table 2 and Fig. 4. As previously observed (31), optimal membrane docking of PKC $\alpha$  required both its recognition lipids PS and PIP<sub>2</sub> and its activating lipid diacylglycerol, but was relatively insensitive to the type of background lipid, such that PC and PE yielded nearly equivalent binding (Fig. 4 A). Optimal docking of MARCKS peptide to the membrane required its known target lipids PS and PIP<sub>2</sub> (16) (Fig. 4 B). Optimal docking of PI3K $\alpha$  required its known target lipid PIP<sub>2</sub> and an activating di-phospho-Tyr-peptide (pY<sub>2</sub>) (Fig. 4 C) possessing two phospho-Tyr residues. The pY<sub>2</sub> peptide efficiently mimics a native PI3K $\alpha$  activation mechanism in which PI3K $\alpha$  binds to diphosphorylated Tyr kinase receptors at the leading edge of chemotaxing cells (29,51,52), where this peptide association triggers exposure of membrane docking surfaces (33,52,53). Finally, optimal membrane binding of both MARCKS and pY<sub>2</sub>-PI3K $\alpha$  required PE rather than PC as the predominant background lipid, as expected for these plasma membrane-targeting proteins (33).

Overall, these findings confirmed that Alexa Fluor 555-labeled versions of PKC $\alpha$ , MARCKS peptide, and PI3K $\alpha$  retained native target membrane binding, and that the PE/PS/DAG/PIP<sub>2</sub> supported bilayer is a useful model system

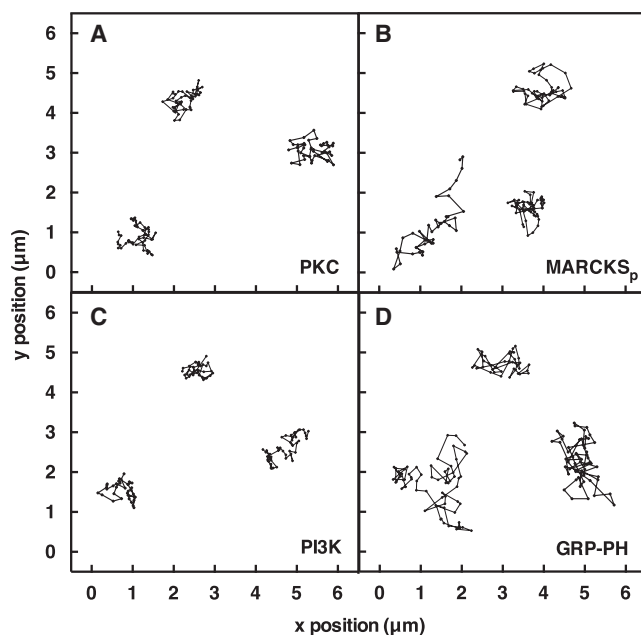

FIGURE 3 (A–D) Representative TIRFM single-particle tracks of freely diffusing fluorescent proteins: (A) PKC $\alpha$ , (B) MARCKS PIP<sub>2</sub>-binding peptide (MARCKS<sub>p</sub>), (C) PI3K $\alpha$ , and (D) GRP1 PH domain. Shown are trajectories composed of 20 ms single steps, captured with a 50 s<sup>-1</sup> frame rate on standard PE/PS/DAG/PIP<sub>2</sub> supported bilayers at 21.5°C.

TABLE 2 Lipid Compositions of the Supported Bilayers Employed in This Study

| Lipid Mixture                               | Lipid Mole %          |
|---------------------------------------------|-----------------------|
| PC/PS                                       | 75:25                 |
| PC/PS/PIP <sub>2</sub>                      | 74:25:1               |
| PE                                          | 100                   |
| PE/PS                                       | 75:25                 |
| PE/PS/PIP <sub>2</sub>                      | 74:25:1               |
| PE/PS/DAG/PIP <sub>2</sub>                  | 73:24:2:1             |
| PE/PS/DAG/PIP <sub>3</sub>                  | 73:24:2:1             |
| PE/PC/PS/Chol/SPM/DAG/PIP <sub>2</sub> (PM) | 28:12:23:26:8:2:1     |
| PE:PS:DAG:PIP <sub>2</sub> (+) LRB-PE       | 73:24:2:1 (+) 200 ppb |

Lipid abbreviations are defined in the “Reagents” section of Materials and Methods.

for single-molecule binding studies of the three fluorescent proteins.

### Quantifying the specific kinase activities of membrane-bound PKC $\alpha$ and PI3K $\alpha$

To carry out quantitative studies of kinase regulation, assays were developed to measure the specific kinase activities of both PKC $\alpha$  and PI3K $\alpha$ . The specific protein kinase activity of PKC $\alpha$  was determined using single-molecule TIRF to quantify the surface density of membrane-bound PKC $\alpha$  (Fig. 4) together with a bulk assay of total, membrane-bound PKC $\alpha$  kinase activity (31). Division of the total kinase activity by the number of membrane-bound kinase molecules yielded the specific kinase activity per molecule. The specific kinase activity of PKC $\alpha$  was unaltered, within error, when the background lipid was changed from PE to PC, or when the simple lipid mixture PE/PS/DAG/PIP<sub>2</sub> was replaced with a more complex mixture containing all the major headgroup components of the plasma membrane inner leaflet (PE/PC/Chol/SM/PIP<sub>2</sub>/DAG), as shown in Fig. 5. These findings show that the simple lipid mixture retains all of the molecular features that are essential for native PKC $\alpha$  target membrane recognition and for the native protein kinase activity of the membrane-bound enzyme.

To quantify the specific activity of the pY<sub>2</sub>-PI3K $\alpha$  complex, we developed a new, to our knowledge, single-molecule lipid kinase activity assay. The bound kinase density on the supported bilayer surface was again determined directly by single-molecule TIRF measurements, and the lipid kinase activity was also monitored by single-molecule TIRF (Fig. 5, B and C). To detect each individual PI(3,4,5)P<sub>3</sub> (henceforth termed PIP<sub>3</sub>) product molecule generated by the lipid kinase on the supported bilayer surface, a saturating concentration of fluorescent GRP1 PH domain was included in the buffer. This PH domain binds specifically with high affinity to the product lipid PIP<sub>3</sub> (36,54–57); thus, when the lipid kinase converted a PIP<sub>2</sub> molecule to PIP<sub>3</sub> the latter product lipid was targeted by the labeled PH domain, yielding a fluorescent, membrane-bound sensor protein that was detected via single-molecule TIRF analysis of its

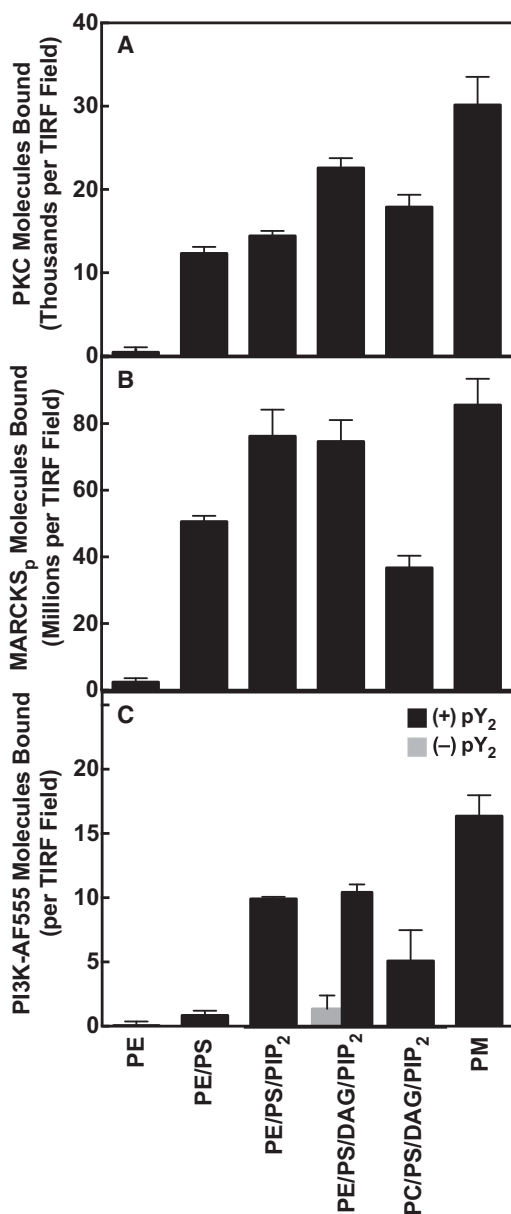

**FIGURE 4** Single-molecule analysis of the effect of lipid composition on the membrane binding of PKC $\alpha$ , PI3K $\alpha$ , and MARCKSp. Single-molecule TIRF quantitation of fluorescent protein/peptide binding to supported lipid bilayers (see Materials and Methods). (A–C) Average total numbers of (A) PKC $\alpha$ , (B) PI3K $\alpha$ , and (C) MARCKSp molecules bound per TIRF field for the indicated lipid compositions (Table 2). Each average was determined from at least 340 temporally isolated frames extracted from at least four separate movies in at least five separate experiments. Error bars are standard errors of the mean ( $n \geq 20$ ). All measurements were obtained at  $21.5^\circ\text{C} \pm 0.5^\circ\text{C}$  on supported bilayers of the indicated lipid composition (see Table 2) in 100 mM KCl, 20 mM HEPES pH 6.9 (optimal pH for PI3K $\alpha$  activity), 15 mM NaCl, 5 mM glutathione, 2.0 mM EGTA, 1.9 mM Ca $^{2+}$ , 1.9 mM Mg $^{2+}$ , 1.0 mM ATP, 100  $\mu\text{g mL}^{-1}$  BSA, and 0.05% CHAPS. Under these conditions, the EGTA-ATP-Ca $^{2+}$ -Mg buffering system yields 10  $\mu\text{M}$  free Ca $^{2+}$  and 0.5 mM free Mg $^{2+}$  (42).

2D diffusion tracks and characteristic diffusion constant. Fig. 5 shows the detection of increasing numbers of single PIP<sub>3</sub> product molecules as the PI3K $\alpha$  reaction proceeded,

and the requirement for the receptor tyrosine kinase-derived pY<sub>2</sub> peptide to activate the lipid kinase. A comparison of the effects of different background lipids (PE and PC) revealed that the specific kinase activity of pY<sub>2</sub>-PI3K $\alpha$  was much more sensitive to background lipid than its membrane binding reaction, such that the specific lipid kinase activity dropped by more than sixfold when the background lipid in the PE/PS/DAG/PIP<sub>2</sub> mixture was changed from PE to PC. This agrees with previous reports that showed a strong sensitivity of PI3K activation to the PC concentration in bulk kinase assays (58), and reveals that the mechanism of this sensitivity arises not from altered membrane binding but rather from a loss of PI3K $\alpha$  specific kinase activity on PC background lipids.

Notably, although pY<sub>2</sub>-PI3K $\alpha$  membrane binding was slightly enhanced when the simple lipid mixture PE/PS/DAG/PIP<sub>2</sub> was replaced with the plasma membrane mimic PE/PC/Chol/SM/PIP<sub>2</sub>, the specific lipid kinase activity per membrane-bound kinase molecule was unaltered, within error (Fig. 5 C). Moreover, for this characteristically rather slow enzyme, the observed turnover rate of approximately five molecules PIP<sub>3</sub> per molecule enzyme per minute was the same, within error, as the value measured in bulk kinase assays (33). Similarly, a comparison of simple lipid mixtures with varying PS levels (Fig. 5 C) shows that an increase in the mole density of PS enhanced the membrane binding of the active pY<sub>2</sub>-PI3K $\alpha$  kinase (not shown), but the specific kinase activity of per membrane-bound PI3K $\alpha$  molecule was the same, within error, at all PS levels. These findings emphasize that the membrane binding of pY<sub>2</sub>-PI3K $\alpha$  is sensitive to the lipid composition, but its specific lipid kinase activity is considerably less sensitive.

Together, these activity studies show that PKC $\alpha$  and PI3K $\alpha$  were both fully functional master kinases on supported bilayers composed of the PE/PS/DAG/PIP<sub>2</sub> lipid mixture, demonstrating that this simple supported bilayer possesses the key molecular features that are essential for native membrane targeting and kinase activity.

### Inhibition of PI3K $\alpha$ lipid kinase activity by the MARCKS peptide

In further studies, we employed single-molecule TIRF to investigate regulation in the Ca $^{2+}$ -PKC-MARCKS-PIP<sub>2</sub>-PI3K-PIP<sub>3</sub> system on the PE/PS/DAG/PIP<sub>2</sub> bilayer. First, MARCKS regulation of pY<sub>2</sub>-PI3K $\alpha$  lipid kinase activity was analyzed. Fig. 6 reveals that the addition of MARCKS peptide to the single-molecule pY<sub>2</sub>-PI3K $\alpha$  lipid kinase reaction slowed the rate of production of PIP<sub>3</sub> by more than fourfold, indicating that the MARCKS peptide can significantly downregulate PI3K $\alpha$  lipid kinase activity. Since the MARCKS peptide is known to bind and sequester up to four PIP<sub>2</sub> molecules with high affinity, two hypotheses could explain the observed MARCKS

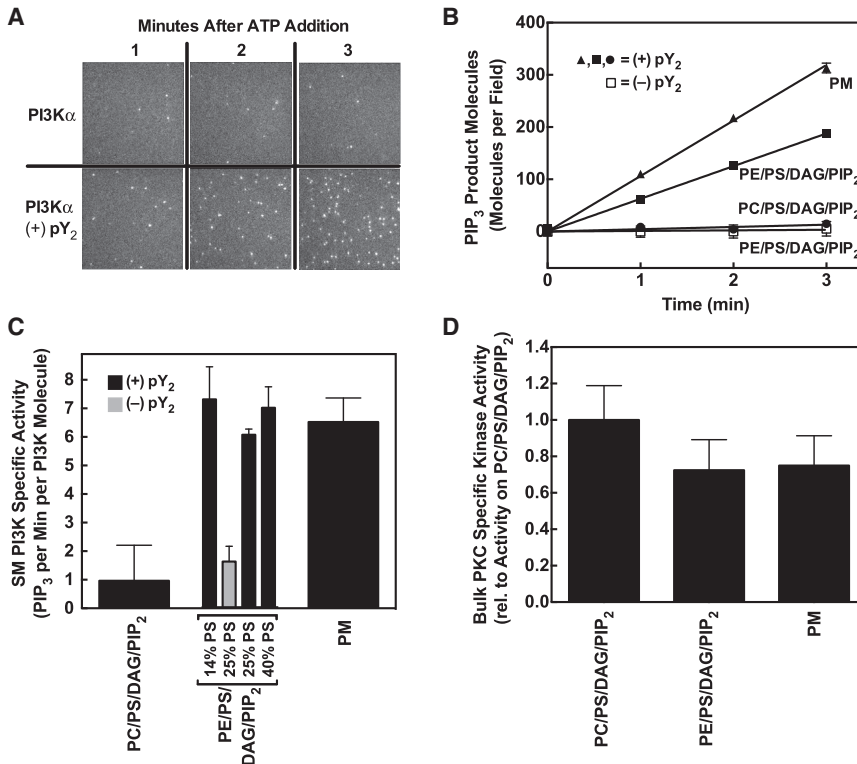

**FIGURE 5** Single-molecule and bulk studies of the effect of lipid composition on the kinase activities of membrane-bound PI3K $\alpha$  and PKC $\alpha$ . (A–C) Representative data from a new, to our knowledge, single-molecule TIRF assay of PI3K lipid kinase activity at 21.5°C  $\pm$  0.5°C on standard PE/PS/DAG/PIP<sub>2</sub> supported bilayers, where the fluorescent high-affinity PIP<sub>3</sub>-sensor GRP1 PH protein was used to tag and detect each molecule of product PIP<sub>3</sub> lipid (Materials and Methods). (A) Raw TIRF images show accumulation of the PIP<sub>3</sub> sensor on the supported bilayer as the reaction proceeds in the absence or presence of a PI3K activator (pY<sub>2</sub> peptide). (B) Increase in the number of total PIP<sub>3</sub> product molecules with time as the PI3K lipid kinase reaction proceeds on supported bilayers of different lipid compositions (Table 2). Again, the negative control lacking the pY<sub>2</sub> peptide activator shows minimal activity. (C) Specific lipid kinase activity per PI3K $\alpha$  molecule for each bilayer composition, determined from the ratio of total lipid kinase activity to the density of bound kinase on the membrane surface (Fig. 4 C). (D) Relative specific kinase activity of PKC $\alpha$  for each bilayer composition, determined from the ratio of total bulk PKC kinase activity (Materials and Methods) to the density of bound kinase on the membrane surface (Fig. 4 A). Single-molecule TIRF conditions as detailed in the Fig. 4 legend.

peptide sensitivity: sequestration of PIP<sub>2</sub> could inhibit pY<sub>2</sub>-PI3K $\alpha$  binding to the membrane, since PIP<sub>2</sub> is its primary docking target, or it could limit the availability of substrate for membrane-bound pY<sub>2</sub>-PI3K $\alpha$ , since PIP<sub>2</sub> is its substrate lipid (or both).

Quantitation of the single-molecule binding density of fluorescent pY<sub>2</sub>-PI3K $\alpha$  revealed that addition of the MARCKS peptide reduced the surface density of bound kinase by ninefold, as shown in Fig. 7 A, to a level similar to that observed when PIP<sub>2</sub> was omitted from the bilayer (Fig. 4). This MARCKS peptide-triggered loss of pY<sub>2</sub>-PI3K $\alpha$  binding is due to sequestration of its PIP<sub>2</sub> target lipid rather than to steric occlusion of the membrane surface, since it is known that pY<sub>2</sub>-PI3K $\alpha$  requires PIP<sub>2</sub> for high-affinity membrane docking (52,59), whereas calculations based on the PIP<sub>2</sub> density and the footprint size of PIP<sub>2</sub>-bound MARCKS peptide (18,60) show that the MARCKS peptide covers only ~10% of the membrane surface under the conditions used here. (A similar result would be expected for full-length MARCKS, since this disordered protein associates with the bilayer only via its lipidation site and its PIP<sub>2</sub>-binding region). Overall, the MARCKS peptide-triggered inhibition of pY<sub>2</sub>-PI3K $\alpha$  membrane binding fully accounts for the inhibitory effect of MARCKS peptide on the PIP<sub>3</sub> synthesis reaction. Once pY<sub>2</sub>-PI3K $\alpha$  binds to the membrane, its lipid kinase activity is similar (within ~2-fold) whether the MARCKS peptide is present or not, providing further evidence that the mechanism of MARCKS inhibition is sequestration

of free PIP<sub>2</sub> and prevention of pY<sub>2</sub>-PI3K $\alpha$  binding to the target membrane.

In contrast to its large effect on pY<sub>2</sub>-PI3K $\alpha$  binding, the MARKCS peptide had little or no effect on Ca<sup>2+</sup>-PKC $\alpha$  binding to the target membrane (Fig. S2 A). This minimal effect of MARCKS peptide on Ca<sup>2+</sup>-PKC $\alpha$  membrane binding was expected because the membrane docking reaction typically begins with binding of the PKC $\alpha$  C2 domain to two PS molecules with high affinity, followed by substitution of one PS by a PIP<sub>2</sub> molecule, which only modestly increases the membrane affinity (61–66). The latter PIP<sub>2</sub> binding event is known to slightly slow the 2D diffusion of Ca<sup>2+</sup>-PKC $\alpha$  (31,67); thus, when PIP<sub>2</sub> was sequestered by MARCKS, a small but reproducible increase in the diffusion speed of Ca<sup>2+</sup>-PKC $\alpha$  was observed (Fig. S2 B). Overall, the sequestration of PIP<sub>2</sub> by the MARCKS peptide greatly inhibited the interaction of the lipid kinase with the target membrane but had comparatively minor effects on the protein kinase.

### Reversal of MARCKS-associated PI3K $\alpha$ inhibition by PKC $\alpha$ protein kinase activity

In a single-molecule experiment monitoring the surface density of fluorescent MARCKS peptide, the addition of active Ca<sup>2+</sup>-PKC $\alpha$  kinase to MARCKS peptide-occupied membranes triggered an approximately exponential decay in the density of total membrane-bound MARCKS peptide molecules toward a lower level, ~51% of the starting



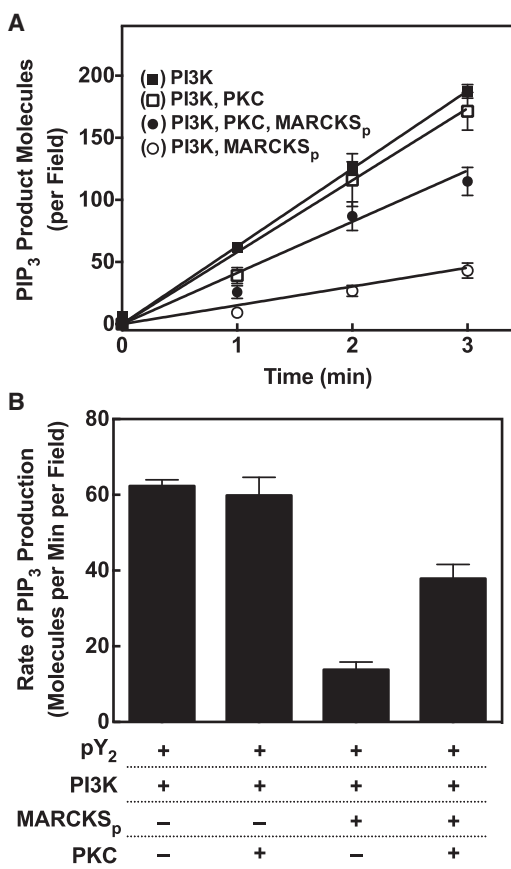

**FIGURE 6** Effects of MARCKS and PKC $\alpha$  on PI3K $\alpha$  lipid kinase activity. Regulation of PI3K $\alpha$  activity was quantified using the single-molecule TIRF assay at 21.5°C  $\pm$  0.5°C on standard PE/PS/DAG/PIP<sub>2</sub> supported bilayers. (A) Time course of PIP<sub>3</sub> production by PI3K $\alpha$ , illustrating the effects of PKC $\alpha$  and MARCKS peptide (MARCKS<sub>p</sub>, the isolated PIP<sub>2</sub>-binding domain of MARCKS) on the net production of product PIP<sub>3</sub> molecules per TIRF field. (B) Slopes of the time courses in (A), showing that PKC $\alpha$  largely restores the PI3K $\alpha$  lipid kinase activity that is lost in the presence of MARCKS<sub>p</sub>, but PKC $\alpha$  has little or no effect on PI3K $\alpha$  activity in the absence of MARCKS<sub>p</sub>. Single-molecule TIRF conditions as detailed in the Fig. 4 legend.

level, as shown in Fig. 7 B. This Ca<sup>2+</sup>-PKC $\alpha$ -triggered loss of membrane-bound MARCKS peptide required ATP and is consistent with the known ability of Ca<sup>2+</sup>-PKC $\alpha$  to phosphorylate the MARCKS peptide at one to three sites (Ser152, Ser156, and Ser163), which dramatically reduces its PIP<sub>2</sub> binding and membrane affinity (14,15,19–23). In addition to triggering the dissociation of bound MARCKS peptide from the membrane, the addition of Ca<sup>2+</sup>-PKC $\alpha$  also yielded increased heterogeneity in the diffusion kinetics of the remaining bound MARCKS peptide, generating at least two diffusional populations as illustrated in Fig. 7 C. The membrane-bound, unphosphorylated MARCKS peptide population decreased with time but retained its characteristic narrow range of diffusion constant (Fig. 7 C). The membrane-bound, phosphorylated population increased with time

and exhibited faster, more heterogeneous diffusion, as expected for MARCKS peptide modified by Ca<sup>2+</sup>-PKC $\alpha$  in a variable fashion at one, two, or three phosphorylation sites, thereby dissociating one, two, or three bound PIP<sub>2</sub> molecules. A peptide with fewer bound lipids experiences less friction due to its bound lipids dragging against the bilayer and thus diffuses faster (68,69).

Single-molecule TIRF also enabled detection and counting of membrane-bound fluorescent PI3K $\alpha$  molecules after Ca<sup>2+</sup>-PKC $\alpha$  addition. In the presence of MARCKS peptide, little PI3K $\alpha$  was bound to the membrane until addition of Ca<sup>2+</sup>-PKC $\alpha$  yielded an approximately exponential increase in the surface density of membrane-bound pY<sub>2</sub>-PI3K $\alpha$  with time, providing direct evidence that Ca<sup>2+</sup>-PKC $\alpha$  phosphorylation of MARCKS peptide enables increased pY<sub>2</sub>-PI3K $\alpha$  binding to its target membrane (Figs. 7, A and C). This exponential rise in pY<sub>2</sub>-PI3K surface density triggered by Ca<sup>2+</sup>-PKC $\alpha$  addition was in good qualitative agreement with the increasing fraction of phospho-MARCKS peptide perturbed by phosphorylation (Fig. 7 D). The total fraction of the starting MARCKS population that was perturbed was calculated by adding the fractions of MARCKS peptide that were dissociated by phosphorylation and those that remained membrane bound but with faster diffusion.

The increasing membrane binding of pY<sub>2</sub>-PI3K $\alpha$  triggered by addition of Ca<sup>2+</sup>-PKC $\alpha$  in the presence of MARCKS peptide yielded a threefold increase in the net rate of PIP<sub>3</sub> production on the membrane surface, due to the increasing population of bound lipid kinase molecules (Fig. 6, A and B). By contrast, in the absence of MARCKS peptide, addition of Ca<sup>2+</sup>-PKC $\alpha$  had little or no effect on the surface density of membrane-bound pY<sub>2</sub>-PI3K $\alpha$  (Fig. 7 A), its 2D diffusion speed (Fig. S3), or its lipid kinase activity (Fig. 6 A). These findings indicate that there was no direct association of the two master kinases in a stable complex, since such a complex would exhibit more stable membrane binding and higher surface density, as well as increased frictional drag and diffusional slowing (40,67). It was previously proposed that some PKC family members are able to directly phosphorylate p85 or p110 in cells, but the PKC isoforms implicated in such phosphorylations do not include PKC $\alpha$  (70,71). The findings presented here indicate that either direct Ca<sup>2+</sup>-PKC $\alpha$  phosphorylation of pY<sub>2</sub>-PI3K $\alpha$  does not occur under the conditions used here, or these phosphorylations have no detectable effect on pY<sub>2</sub>-PI3K $\alpha$  membrane binding, diffusion, and kinase activity.

Overall, our findings support a simple model in which Ca<sup>2+</sup>-PKC $\alpha$  has no direct stable association with pY<sub>2</sub>-PI3K $\alpha$ , but instead regulates pY<sub>2</sub>-PI3K $\alpha$  indirectly by phosphorylating MARCKS peptide and releasing sequestered PIP<sub>2</sub>. The resulting free PIP<sub>2</sub>, in turn, recruits pY<sub>2</sub>-PI3K $\alpha$  to the membrane to yield a larger population of active, membrane-bound lipid kinase. The rising surface density of

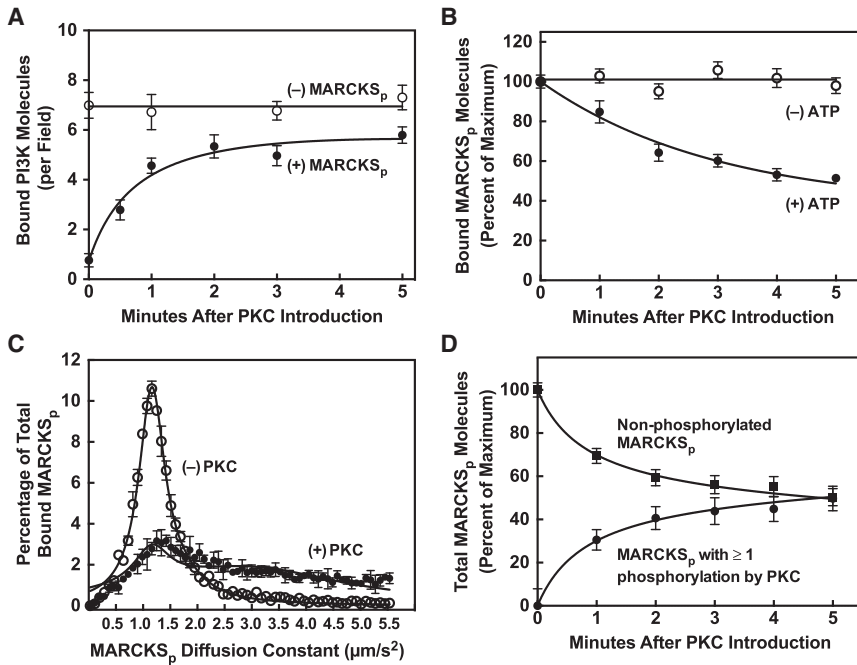

**FIGURE 7** Kinetic binding analysis of individual master kinase circuit components during PKC $\alpha$ -MARCKSp regulation of PI3K $\alpha$ . Shown are single-molecule TIRF data analyzing fluorescent protein populations on standard PE/PS/DAG/PIP<sub>2</sub> supported lipid bilayers at 21.5°C in reactions triggered by adding PKC $\alpha$  to samples containing all other components, including Ca<sup>2+</sup>. (A) Surface density of membrane-bound fluorescent PI3K $\alpha$  in reactions containing or lacking MARCKSp, where PKC $\alpha$  is added at time zero. In the presence of MARCKSp, the binding of PI3K $\alpha$  to the supported bilayer is minimal until Ca<sup>2+</sup>-PKC $\alpha$  phosphorylates MARCKSp and releases sequestered PIP<sub>2</sub>. (B) Surface density of membrane-bound fluorescent MARCKSp after PKC $\alpha$  addition at time zero in the presence and absence of ATP. In the presence of ATP, Ca<sup>2+</sup>-PKC $\alpha$  phosphorylates MARCKS and drives its dissociation from the supported bilayer. (C) Frequency distributions for 2D diffusion of the membrane-bound fluorescent MARCKSp population in the absence and presence of Ca<sup>2+</sup>-PKC $\alpha$ . Before Ca<sup>2+</sup>-PKC $\alpha$  treatment of Ca<sup>2+</sup>-PKC $\alpha$ , the MARCKSp population (open circles) is homogenous. After Ca<sup>2+</sup>-PKC $\alpha$  treatment, two subpopulations are observed: a smaller group of

the same slowly diffusing, homogeneous, unphosphorylated species and a new group of more heterogeneous, faster-diffusing, phosphorylated species. The heterogeneous diffusion of the phosphorylated subpopulation arises from statistical phosphorylation of the three phosphorylation sites, which in turn yields the loss of different numbers of bound PIP<sub>2</sub> molecules and different frictional drag reductions. (D) Fraction of the fluorescent MARCKSp population that is unphosphorylated or phosphorylated at one or more sites after Ca<sup>2+</sup>-PKC $\alpha$  treatment for the indicated time, as defined by the two subpopulations in (C). Single-molecule TIRF assay conditions as detailed in the Fig. 4 legend.

active pY<sub>2</sub>-PI3K $\alpha$  fully accounts for the observed increased PIP<sub>3</sub> production.

## DISCUSSION

### Regulation of PI3K lipid kinase activity by PKC and MARCKS: molecular mechanisms

Our results provide direct evidence that Ca<sup>2+</sup>-PKC $\alpha$  and MARCKS peptide together, or MARCKS peptide alone, can regulate pY<sub>2</sub>-PI3K $\alpha$  lipid kinase activity and PIP<sub>3</sub> production. In cells and in vitro, each MARCKS molecule is known to bind and sequester up to four PIP<sub>2</sub> molecules (17,72). Here, we find that the resulting PIP<sub>2</sub> sequestration can inhibit the membrane docking reaction of pY<sub>2</sub>-PI3K $\alpha$ , thereby yielding a lower surface density of membrane-bound pY<sub>2</sub>-PI3K $\alpha$  and reducing the net lipid kinase activity by approximately the same factor.

These findings also reveal that Ca<sup>2+</sup>-PKC $\alpha$  phosphorylates MARCKS peptide and thus decreases its capacity to sequester PIP<sub>2</sub>, yielding free PIP<sub>2</sub> that recruits active pY<sub>2</sub>-PI3K $\alpha$  to the membrane and thereby restores its lipid kinase activity. Addition of Ca<sup>2+</sup>-PKC $\alpha$  stimulates these membrane-binding and kinase reactions only when pY<sub>2</sub>-PI3K $\alpha$  is suppressed by MARCKS peptide. In contrast, in the absence of MARCKS peptide, pY<sub>2</sub>-PI3K $\alpha$  exhibits unsuppressed, high levels of membrane binding and kinase activ-

ity, and the addition of Ca<sup>2+</sup>-PKC $\alpha$  does not significantly alter the surface density, the specific kinase activity, or the 2D diffusion speed of membrane-bound pY<sub>2</sub>-PI3K $\alpha$  molecules. It follows that the observed Ca<sup>2+</sup>-PKC $\alpha$  stimulation of pY<sub>2</sub>-PI3K $\alpha$  lipid kinase activity does not involve a direct interaction between the two kinases, but instead arises indirectly via phosphorylation of MARCKS peptide and release of sequestered PIP<sub>2</sub>.

Ca<sup>2+</sup>-PKC $\alpha$ -catalyzed phosphorylation of MARCKS peptide and the release of PIP<sub>2</sub> is a complex reaction that generates multiple intermediates and products, but grouping these diverse outcomes into two general categories yields a simple scheme that qualitatively explains the observed kinetics. Each unphosphorylated MARCKS peptide binds and sequesters up to four PIP<sub>2</sub> molecules and possesses three PKC phosphorylation sites (17,20,72). Ca<sup>2+</sup>-PKC $\alpha$  phosphorylation fully dissociates one subset of MARCKS peptides from the membrane and releases their bound PIP<sub>2</sub> molecules, while a second subset of partially phosphorylated MARCKS peptides remain membrane bound and diffuse more rapidly on the membrane surface, indicating they have less frictional drag against the bilayer due to the loss of one or more bound PIP<sub>2</sub> molecules. After addition of active Ca<sup>2+</sup>-PKC $\alpha$  to the MARCKS-PI3K system, the net fraction of the MARCKS population that was perturbed by Ca<sup>2+</sup>-PKC $\alpha$  phosphorylation (i.e., the sum of the dissociated and fast diffusing components) increased with a time

dependence qualitatively similar to that of pY<sub>2</sub>-PI3K $\alpha$  binding to the membrane. Together, these observations reveal that Ca<sup>2+</sup>-PKC $\alpha$  restoration of pY<sub>2</sub>-PI3K $\alpha$  lipid kinase activity inhibited by the MARCKS peptide arises simply via phosphorylation of the MARCKS peptide and the release of sequestered PIP<sub>2</sub>, which restores the docking of active pY<sub>2</sub>-PI3K $\alpha$  to the membrane.

### Regulation of PI3K lipid kinase activity by Ca<sup>2+</sup>-PKC and MARCKS: biological implications

Previous studies have established the importance of PKC-catalyzed phosphorylation of MARCKS and the release of sequestered PIP<sub>2</sub> in stimulating diverse cellular pathways (73–76). The mechanism of this regulation involves the recruitment of PIP<sub>2</sub>-binding proteins to the membrane via the increased surface density of free PIP<sub>2</sub>. To our knowledge, this is the first study to show that a PI3K isoform is recruited to the membrane by PKC-triggered MARCKS phosphorylation and the release of sequestered PIP<sub>2</sub>. In the cell, full-length MARCKS and PI3K can both be anchored to the membrane via myristoylation and receptor binding, respectively, and therefore both will exhibit enhanced PIP<sub>2</sub> affinities. The relative cellular PIP<sub>2</sub> affinities are predicted to be MARCKS > PI3K > (other PIP<sub>2</sub>-binding proteins) to ensure that MARCKS effectively sequesters PIP<sub>2</sub> and prevents the membrane targeting of the other components until the MARCKS sequestration is released. Then PI3K must compete with the other PIP<sub>2</sub>-binding proteins for the limited free PIP<sub>2</sub> population, and the receptor-bound PI3K molecules will be especially good competitors due to their membrane-anchored status. Since a single membrane-bound PKC molecule will generally phosphorylate multiple MARCKS proteins during its membrane-bound lifetime, it will catalytically release many PIP<sub>2</sub> molecules, each of which may bind a PI3K molecule that is capable of synthesizing multiple PIP<sub>3</sub> molecules, making the Ca<sup>2+</sup>-PKC-MARCKS-PIP<sub>2</sub>-PI3K-PIP<sub>3</sub> system a cascading amplification module.

In this study, we focused on PKC $\alpha$  and found no direct effect of PKC $\alpha$  on pY<sub>2</sub>-PI3K $\alpha$  membrane binding or kinase activity; however, previous studies indicated that other PKC isoforms can activate certain PI3K isoforms directly. For example, PKC $\beta$  activates PI3K $\gamma$  through direct phosphorylation of the p110 $\gamma$  catalytic subunit (71), and PKC $\mu$  (PKD) is able to phosphorylate an SH2 domain of the p85 $\alpha$  subunit and thereby block PI3K activation by receptor-associated phospho-Tyr sequences (70). Thus, it appears that different PKC isoforms can modify PI3K-catalyzed PIP<sub>3</sub> production through distinct mechanisms.

Fig. 1 presents a hypothesized information flow through a postulated Ca<sup>2+</sup>-PKC-MARCKS-PIP<sub>2</sub>-PI3K-PIP<sub>3</sub> amplification module at the leading-edge membrane of a chemotaxing leukocyte (2,7). The findings presented here strongly support this scheme by showing that, as predicted,

Ca<sup>2+</sup>-PKC $\alpha$  does amplify pY<sub>2</sub>-PI3K $\alpha$  lipid kinase activity in vitro when MARCKS peptide is present to sequester PIP<sub>2</sub> and act as an indirect activity coupler between the two master kinases. This model is supported by in vivo findings in chemotaxing RAW 264.7 cells, a macrophage model system, wherein 1) Ca<sup>2+</sup>-PKC $\alpha$  and PIP<sub>3</sub> both accumulate at the leading-edge membrane and 2) a cytoplasmic Ca<sup>2+</sup> signal dramatically stimulates PIP<sub>3</sub> production at the leading edge. The model further predicts that the local density of MARCKS bound to PIP<sub>2</sub> will be lower at the leading edge than in other regions of the plasma membrane, and that this density will be sensitive to leading-edge signals.

In leading-edge signaling, the Ca<sup>2+</sup>-PKC-MARCKS-PIP<sub>2</sub>-PI3K-PIP<sub>3</sub> amplification module is proposed to be part of a larger positive-feedback loop in which stimulation or inhibition of any one component triggers the activation or inactivation, respectively, of all feedback loop components (1,2,5–9). In a simple working model, one mechanism of positive feedback could involve PIP<sub>3</sub>-triggered recruitment of the protein kinase PDK1 to the membrane, where it is phospho-activated (77,78). Active phospho-PDK1 plays an important role in phospho-activating and stabilizing PKC (79–82); thus, the downstream output PIP<sub>3</sub> signal of the Ca<sup>2+</sup>-PKC-MARCKS-PIP<sub>2</sub>-PI3K-PIP<sub>3</sub> module could increase the level of active and stable PKC, thereby upregulating the input Ca<sup>2+</sup>-PKC signal of the module and completing the cycle of the positive-feedback loop.

PKC activity in the positive-feedback loop requires a source of its activating lipid diacylglycerol. Rac/Rho GTPases have been implicated as essential components of the positive-feedback loop, and Rac has been proposed to activate phospholipase C $\beta$ 2 (PLC $\beta$ 2) (83,84), which hydrolyzes PIP<sub>2</sub> and thereby generates diacylglycerol, which can activate PKC (85,86), as well as IP<sub>3</sub>, which can trigger local intracellular Ca<sup>2+</sup> signals (87). To maintain the activity of the Ca<sup>2+</sup>-PKC-MARCKS-PIP<sub>2</sub>-PI3K-PIP<sub>3</sub> module, PLC $\beta$ 2 need only hydrolyze a small fraction of the leading-edge PIP<sub>2</sub> molecules, since the molecular density of PIP<sub>2</sub> is orders of magnitude larger than the density of membrane-bound PKC.

Proposed downstream effects of the positive-feedback loop include events that regulate actin polymerization and other events during expansion of the leading edge up an attractant gradient. PKC-triggered MARCKS dissociation and release of sequestered PIP<sub>2</sub> is hypothesized to recruit N-WASP to the membrane, which forms active, membrane-bound dimers bound to PIP<sub>2</sub> and assembles the other components of the actin nucleation complex that forms between N-WASP and Arp2/3, initiating the growth of new actin filaments (88,89). PIP<sub>3</sub>-activated PDK1 directly phospho-activates p21-activated kinase 1 (PAK1) (90) and protein kinase B (PKB/AKT1) (80,91–93), and both of these phosphorylation reactions are essential for cell migration. Downstream targets of phospho-activated AKT1 include palladin (94), girdin (95), and the Raf component of the

Ras/Raf/MEK/ERK signaling pathway (96,97). Each of these PDK1-triggered, phospho-signaling reactions has been linked to actin remodeling during migration.

Beyond its role in chemotaxis, PKC-MARCKS modulation of PI3K-catalyzed PIP<sub>3</sub> production may regulate other crucial pathways in normal cells, including oncogenesis in cancer cells. Nonchemotactic pathways in which PIP<sub>3</sub> signals play a central role, and thus might involve PKC-MARCKS regulation, include cell survival, apoptosis, growth, and metabolism (98). Dozens of oncogenic mutations have been described in PI3K, many of which stimulate PIP<sub>3</sub> production and thereby stimulate cell growth and/or inhibit apoptosis (28,33,99,100). Alternatively, certain PIP<sub>3</sub> signaling pathways may employ other regulatory mechanisms that do not involve PKC-MARCKS to modulate PI3K activity. For example, in some pathways, G $\alpha_q$  inhibits PI3K and is a potent activator of PLC $\beta$ 2 (84,101,102).

Further single-molecule studies are needed to test and quantify the proposed pathway connections between the protein components of the reconstituted Ca<sup>2+</sup>-PKC-MARCKS-PIP<sub>2</sub>-PI3K-PIP<sub>3</sub> amplification circuit. This study shows the power of the single-molecule approach to analyze reconstituted functional pathways on membrane surfaces, enabling careful hypothesis testing and quantitation of information flow between multiple pathway elements, and providing unexpected new insights into pathway connections and regulatory mechanisms. The resulting quantitative data will be useful for developing mathematical models of the signaling network and will yield predictions suitable for rigorous testing in live cells.

## SUPPORTING MATERIAL

Three figures are available at [http://www.biophysj.org/biophysj/supplemental/S0006-3495\(16\)30040-6](http://www.biophysj.org/biophysj/supplemental/S0006-3495(16)30040-6).

## AUTHOR CONTRIBUTIONS

Conceived and coordinated the study, designed the experiments, and wrote the manuscript: B.P.Z. and J.J.F. Performed the experiments and analyzed the data: B.P.Z. Discussed and interpreted results: J.J.F., B.P.Z., R.L.W., J.E.B., and G.M. Contributed reagents, materials, and analysis tools: R.L.W., J.E.B., and G.M.

## ACKNOWLEDGMENTS

This work was funded by grants from the National Institutes of Health (R01 GM063235 to J.J.F.) and the British Heart Foundation (PG11/109/29247 and MRC U10518430 to R.L.W.).

## REFERENCES

- Artemenko, Y., T. J. Lampert, and P. N. Devreotes. 2014. Moving towards a paradigm: common mechanisms of chemotactic signaling in Dictyostelium and mammalian leukocytes. *Cell. Mol. Life Sci.* 71:3711–3747.
- Falke, J. J., and B. P. Ziemba. 2014. Interplay between phosphoinositide lipids and calcium signals at the leading edge of chemotaxing amoeboid cells. *Chem. Phys. Lipids.* 182:73–79.
- Swaney, K. F., C. H. Huang, and P. N. Devreotes. 2010. Eukaryotic chemotaxis: a network of signaling pathways controls motility, directional sensing, and polarity. *Annu. Rev. Biophys.* 39:265–289.
- Stephens, L., L. Milne, and P. Hawkins. 2008. Moving towards a better understanding of chemotaxis. *Curr. Biol.* 18:R485–R494.
- Bourne, H. R., and O. Weiner. 2002. A chemical compass. *Nature.* 419:21.
- Kölsch, V., P. G. Charest, and R. A. Firtel. 2008. The regulation of cell motility and chemotaxis by phospholipid signaling. *J. Cell Sci.* 121:551–559.
- Evans, J. H., and J. J. Falke. 2007. Ca<sup>2+</sup> influx is an essential component of the positive-feedback loop that maintains leading-edge structure and activity in macrophages. *Proc. Natl. Acad. Sci. USA.* 104:16176–16181.
- Charest, P. G., and R. A. Firtel. 2006. Feedback signaling controls leading-edge formation during chemotaxis. *Curr. Opin. Genet. Dev.* 16:339–347.
- Beerman, R. W., M. A. Matty, ..., D. M. Tobin. 2015. Direct in vivo manipulation and imaging of calcium transients in neutrophils identify a critical role for leading-edge calcium flux. *Cell Reports.* 13:2107–2117.
- Wei, C., X. Wang, ..., H. Cheng. 2012. Calcium gradients underlying cell migration. *Curr. Opin. Cell Biol.* 24:254–261.
- Tsai, F. C., and T. Meyer. 2012. Ca<sup>2+</sup> pulses control local cycles of lamellipodia retraction and adhesion along the front of migrating cells. *Curr. Biol.* 22:837–842.
- Collins, S. R., and T. Meyer. 2009. Calcium flickers lighting the way in chemotaxis? *Dev. Cell.* 16:160–161.
- Wei, C., X. Wang, ..., H. Cheng. 2009. Calcium flickers steer cell migration. *Nature.* 457:901–905.
- Gambhir, A., G. Hangyás-Mihályné, ..., S. McLaughlin. 2004. Electrostatic sequestration of PIP<sub>2</sub> on phospholipid membranes by basic/aromatic regions of proteins. *Biophys. J.* 86:2188–2207.
- McLaughlin, S., J. Wang, ..., D. Murray. 2002. PIP(2) and proteins: interactions, organization, and information flow. *Annu. Rev. Biophys. Biomol. Struct.* 31:151–175.
- Wang, J., A. Gambhir, ..., S. McLaughlin. 2002. Lateral sequestration of phosphatidylinositol 4,5-bisphosphate by the basic effector domain of myristoylated alanine-rich C kinase substrate is due to nonspecific electrostatic interactions. *J. Biol. Chem.* 277:34401–34412.
- Rauch, M. E., C. G. Ferguson, ..., D. S. Cafiso. 2002. Myristoylated alanine-rich C kinase substrate (MARCKS) sequesters spin-labeled phosphatidylinositol 4,5-bisphosphate in lipid bilayers. *J. Biol. Chem.* 277:14068–14076.
- Ellena, J. F., M. C. Burnitz, and D. S. Cafiso. 2003. Location of the myristoylated alanine-rich C-kinase substrate (MARCKS) effector domain in negatively charged phospholipid bilayers. *Biophys. J.* 85:2442–2448.
- Ohmori, S., N. Sakai, ..., N. Saito. 2000. Importance of protein kinase C targeting for the phosphorylation of its substrate, myristoylated alanine-rich C-kinase substrate. *J. Biol. Chem.* 275:26449–26457.
- Palmer, R. H., D. C. Schönwasser, ..., P. J. Parker. 1996. PRK1 phosphorylates MARCKS at the PKC sites: serine 152, serine 156 and serine 163. *FEBS Lett.* 378:281–285.
- Vergheze, G. M., J. D. Johnson, ..., P. J. Blackshear. 1994. Protein kinase C-mediated phosphorylation and calmodulin binding of recombinant myristoylated alanine-rich C kinase substrate (MARCKS) and MARCKS-related protein. *J. Biol. Chem.* 269:9361–9367.
- Heemskerk, F. M., H. C. Chen, and F. L. Huang. 1993. Protein kinase C phosphorylates Ser152, Ser156 and Ser163 but not Ser160 of MARCKS in rat brain. *Biochem. Biophys. Res. Commun.* 190:236–241.

23. Taniguchi, H., and S. Manenti. 1993. Interaction of myristoylated alanine-rich protein kinase C substrate (MARCKS) with membrane phospholipids. *J. Biol. Chem.* 268:9960–9963.
24. Haughian, J. M., E. M. Reno, ..., A. P. Bradford. 2009. Protein kinase C alpha-dependent signaling mediates endometrial cancer cell growth and tumorigenesis. *Int. J. Cancer.* 125:2556–2564.
25. Griner, E. M., and M. G. Kazanietz. 2007. Protein kinase C and other diacylglycerol effectors in cancer. *Nat. Rev. Cancer.* 7:281–294.
26. Braccini, L., E. Ciraolo, ..., E. Hirsch. 2012. PI3K keeps the balance between metabolism and cancer. *Adv. Biol. Regul.* 52:389–405.
27. Wong, K. K., J. A. Engelman, and L. C. Cantley. 2010. Targeting the PI3K signaling pathway in cancer. *Curr. Opin. Genet. Dev.* 20:87–90.
28. Yuan, T. L., and L. C. Cantley. 2008. PI3K pathway alterations in cancer: variations on a theme. *Oncogene.* 27:5497–5510.
29. Schmid, M. C., C. J. Avraamides, ..., J. A. Varner. 2011. Receptor tyrosine kinases and TLR/IL1Rs unexpectedly activate myeloid cell PI3K $\gamma$ , a single convergent point promoting tumor inflammation and progression. *Cancer Cell.* 19:715–727.
30. Soh, J. W., and I. B. Weinstein. 2003. Roles of specific isoforms of protein kinase C in the transcriptional control of cyclin D1 and related genes. *J. Biol. Chem.* 278:34709–34716.
31. Ziemba, B. P., J. Li, ..., J. J. Falke. 2014. Single-molecule studies reveal a hidden key step in the activation mechanism of membrane-bound protein kinase C- $\alpha$ . *Biochemistry.* 53:1697–1713.
32. Yin, J., A. J. Lin, ..., C. T. Walsh. 2006. Site-specific protein labeling by Sfp phosphopantetheinyl transferase. *Nat. Protoc.* 1:280–285.
33. Hon, W. C., A. Berndt, and R. L. Williams. 2012. Regulation of lipid binding underlies the activation mechanism of class IA PI3-kinases. *Oncogene.* 31:3655–3666.
34. Knight, J. D., M. G. Lerner, ..., J. J. Falke. 2010. Single molecule diffusion of membrane-bound proteins: window into lipid contacts and bilayer dynamics. *Biophys. J.* 99:2879–2887.
35. Nair, P. M., K. Salaita, ..., J. T. Groves. 2011. Using patterned supported lipid membranes to investigate the role of receptor organization in intercellular signaling. *Nat. Protoc.* 6:523–539.
36. Knight, J. D., and J. J. Falke. 2009. Single-molecule fluorescence studies of a PH domain: new insights into the membrane docking reaction. *Biophys. J.* 96:566–582.
37. Davis, M. I., A. T. Sasaki, ..., A. Simeonov. 2013. A homogeneous, high-throughput assay for phosphatidylinositol 5-phosphate 4-kinase with a novel, rapid substrate preparation. *PLoS One.* 8:e54127.
38. Somoza, J. R., D. Koditek, ..., M. E. McGrath. 2015. Structural, biochemical, and biophysical characterization of idelalisib binding to phosphoinositide 3-kinase  $\delta$ . *J. Biol. Chem.* 290:8439–8446.
39. Pacold, M. E., S. Suire, ..., R. L. Williams. 2000. Crystal structure and functional analysis of Ras binding to its effector phosphoinositide 3-kinase gamma. *Cell.* 103:931–943.
40. Ziemba, B. P., J. D. Knight, and J. J. Falke. 2012. Assembly of membrane-bound protein complexes: detection and analysis by single molecule diffusion. *Biochemistry.* 51:1638–1647.
41. Sbalzarini, I. F., and P. Koumoutsakos. 2005. Feature point tracking and trajectory analysis for video imaging in cell biology. *J. Struct. Biol.* 151:182–195.
42. Bers, D. M., C. W. Patton, and R. Nuccitelli. 2010. A practical guide to the preparation of Ca(2+) buffers. *Methods Cell Biol.* 99:1–26.
43. Tamm, L. K., and H. M. McConnell. 1985. Supported phospholipid bilayers. *Biophys. J.* 47:105–113.
44. Tamm, L. K. 1988. Lateral diffusion and fluorescence microscope studies on a monoclonal antibody specifically bound to supported phospholipid bilayers. *Biochemistry.* 27:1450–1457.
45. Kalb, E., S. Frey, and L. K. Tamm. 1992. Formation of supported planar bilayers by fusion of vesicles to supported phospholipid monolayers. *Biochim. Biophys. Acta.* 1103:307–316.
46. Newton, A. C. 2009. Lipid activation of protein kinases. *J. Lipid Res.* 50 (Suppl):S266–S271.
47. Newton, A. C. 2003. Regulation of the ABC kinases by phosphorylation: protein kinase C as a paradigm. *Biochem. J.* 370:361–371.
48. Leonard, T. A., and J. H. Hurley. 2011. Regulation of protein kinases by lipids. *Curr. Opin. Struct. Biol.* 21:785–791.
49. Leonard, T. A., B. Różycki, ..., J. H. Hurley. 2011. Crystal structure and allosteric activation of protein kinase C  $\beta$ II. *Cell.* 144:55–66.
50. Kooijman, E. E., and A. Gericke. 2014. Physical chemistry and biophysics of polyphosphoinositide mediated lipid signaling. *Chem. Phys. Lipids.* 182:1–2.
51. He, Y., A. Kapoor, ..., F. Wang. 2011. The non-receptor tyrosine kinase Lyn controls neutrophil adhesion by recruiting the CrkL-C3G complex and activating Rap1 at the leading edge. *J. Cell Sci.* 124:2153–2164.
52. Carpenter, C. L., K. R. Auger, ..., L. C. Cantley. 1993. Phosphoinositide 3-kinase is activated by phosphopeptides that bind to the SH2 domains of the 85-kDa subunit. *J. Biol. Chem.* 268:9478–9483.
53. Burke, J. E., and R. L. Williams. 2013. Dynamic steps in receptor tyrosine kinase mediated activation of class IA phosphoinositide 3-kinases (PI3K) captured by H/D exchange (HDX-MS). *Adv. Biol. Regul.* 53:97–110.
54. Corbin, J. A., R. A. Dirx, and J. J. Falke. 2004. GRP1 pleckstrin homology domain: activation parameters and novel search mechanism for rare target lipid. *Biochemistry.* 43:16161–16173.
55. Park, W. S., W. D. Heo, ..., M. N. Teruel. 2008. Comprehensive identification of PIP3-regulated PH domains from *C. elegans* to *H. sapiens* by model prediction and live imaging. *Mol. Cell.* 30:381–392.
56. Lemmon, M. A. 2008. Membrane recognition by phospholipid-binding domains. *Nat. Rev. Mol. Cell Biol.* 9:99–111.
57. Ferguson, K. M., J. M. Kavran, ..., M. A. Lemmon. 2000. Structural basis for discrimination of 3-phosphoinositides by pleckstrin homology domains. *Mol. Cell.* 6:373–384.
58. Carpenter, C. L., B. C. Duckworth, ..., L. C. Cantley. 1990. Purification and characterization of phosphoinositide 3-kinase from rat liver. *J. Biol. Chem.* 265:19704–19711.
59. Burke, J. E., O. Vadas, ..., R. L. Williams. 2011. Dynamics of the phosphoinositide 3-kinase p110 $\delta$  interaction with p85 $\alpha$  and membranes reveals aspects of regulation distinct from p110 $\alpha$ . *Structure.* 19:1127–1137.
60. Qin, Z., and D. S. Cafiso. 1996. Membrane structure of protein kinase C and calmodulin binding domain of myristoylated alanine rich C kinase substrate determined by site-directed spin labeling. *Biochemistry.* 35:2917–2925.
61. Corbalán-García, S., J. García-García, ..., J. C. Gómez-Fernández. 2003. A new phosphatidylinositol 4,5-bisphosphate-binding site located in the C2 domain of protein kinase Calpha. *J. Biol. Chem.* 278:4972–4980.
62. Corbalán-García, S., M. Guerrero-Valero, ..., J. C. Gómez-Fernández. 2007. The C2 domains of classical/conventional PKCs are specific PtdIns(4,5)P(2)-sensing domains. *Biochem. Soc. Trans.* 35:1046–1048.
63. Corbin, J. A., J. H. Evans, ..., J. J. Falke. 2007. Mechanism of specific membrane targeting by C2 domains: localized pools of target lipids enhance Ca<sup>2+</sup> affinity. *Biochemistry.* 46:4322–4336.
64. Evans, J. H., D. Murray, ..., J. J. Falke. 2006. Specific translocation of protein kinase Calpha to the plasma membrane requires both Ca<sup>2+</sup> and PIP2 recognition by its C2 domain. *Mol. Biol. Cell.* 17:56–66.
65. Lai, C. L., K. E. Landgraf, ..., J. J. Falke. 2010. Membrane docking geometry and target lipid stoichiometry of membrane-bound PKC $\alpha$  C2 domain: a combined molecular dynamics and experimental study. *J. Mol. Biol.* 402:301–310.
66. Landgraf, K. E., N. J. Malmberg, and J. J. Falke. 2008. Effect of PIP2 binding on the membrane docking geometry of PKC alpha C2 domain: an EPR site-directed spin-labeling and relaxation study. *Biochemistry.* 47:8301–8316.
67. Ziemba, B. P., and J. J. Falke. 2013. Lateral diffusion of peripheral membrane proteins on supported lipid bilayers is controlled by the

- additive frictional drags of (1) bound lipids and (2) protein domains penetrating into the bilayer hydrocarbon core. *Chem. Phys. Lipids*. 172:173:67–77.
68. Kim, J., P. J. Blackshear, ..., S. McLaughlin. 1994. Phosphorylation reverses the membrane association of peptides that correspond to the basic domains of MARCKS and neuromodulin. *Biophys. J.* 67:227–237.
  69. Byers, D. M., F. B. Palmer, ..., H. W. Cook. 1993. Dissociation of phosphorylation and translocation of a myristoylated protein kinase C substrate (MARCKS protein) in C6 glioma and N1E-115 neuroblastoma cells. *J. Neurochem.* 60:1414–1421.
  70. Lee, J. Y., Y. H. Chiu, ..., L. C. Cantley. 2011. Inhibition of PI3K binding to activators by serine phosphorylation of PI3K regulatory subunit p85alpha Src homology-2 domains. *Proc. Natl. Acad. Sci. USA.* 108:14157–14162.
  71. Walser, R., J. E. Burke, ..., M. P. Wymann. 2013. PKC $\beta$  phosphorylates PI3K $\gamma$  to activate it and release it from GPCR control. *PLoS Biol.* 11:e1001587.
  72. Wang, J., A. Gambhir, ..., D. Murray. 2004. A computational model for the electrostatic sequestration of PI(4,5)P2 by membrane-adsorbed basic peptides. *Biophys. J.* 86:1969–1986.
  73. Li, J., K. L. O'Connor, ..., B. M. Evers. 2005. Myristoylated alanine-rich C kinase substrate-mediated neurotensin release via protein kinase C-delta downstream of the Rho/ROK pathway. *J. Biol. Chem.* 280:8351–8357.
  74. Myat, M. M., S. Anderson, ..., A. Aderem. 1997. MARCKS regulates membrane ruffling and cell spreading. *Curr. Biol.* 7:611–614.
  75. Sundaram, M., H. W. Cook, and D. M. Byers. 2004. The MARCKS family of phospholipid binding proteins: regulation of phospholipase D and other cellular components. *Biochem. Cell Biol.* 82:191–200.
  76. Lanier, L. M., and F. B. Gertler. 2000. Actin cytoskeleton: thinking globally, actin' locally. *Curr. Biol.* 10:R655–R657.
  77. Masters, T. A., V. Calleja, ..., B. Larjani. 2010. Regulation of 3-phosphoinositide-dependent protein kinase 1 activity by homodimerization in live cells. *Sci. Signal.* 3:ra78.
  78. Gao, X., and T. K. Harris. 2006. Role of the PH domain in regulating in vitro autophosphorylation events required for reconstitution of PDK1 catalytic activity. *Bioorg. Chem.* 34:200–223.
  79. Dutil, E. M., L. M. Keranen, ..., A. C. Newton. 1994. In vivo regulation of protein kinase C by trans-phosphorylation followed by autophosphorylation. *J. Biol. Chem.* 269:29359–29362.
  80. Sonnenburg, E. D., T. Gao, and A. C. Newton. 2001. The phosphoinositide-dependent kinase, PDK-1, phosphorylates conventional protein kinase C isozymes by a mechanism that is independent of phosphoinositide 3-kinase. *J. Biol. Chem.* 276:45289–45297.
  81. Gao, T., A. Toker, and A. C. Newton. 2001. The carboxyl terminus of protein kinase c provides a switch to regulate its interaction with the phosphoinositide-dependent kinase, PDK-1. *J. Biol. Chem.* 276:19588–19596.
  82. Dutil, E. M., A. Toker, and A. C. Newton. 1998. Regulation of conventional protein kinase C isozymes by phosphoinositide-dependent kinase 1 (PDK-1). *Curr. Biol.* 8:1366–1375.
  83. Illenberger, D., C. Walliser, ..., Y. I. Henis. 2003. Rac2 regulation of phospholipase C-beta 2 activity and mode of membrane interactions in intact cells. *J. Biol. Chem.* 278:8645–8652.
  84. Gutman, O., C. Walliser, ..., Y. I. Henis. 2010. Differential regulation of phospholipase C-beta2 activity and membrane interaction by Galphaq, Gbeta1gamma2, and Rac2. *J. Biol. Chem.* 285:3905–3915.
  85. Fukami, K., S. Inanobe, ..., Y. Nakamura. 2010. Phospholipase C is a key enzyme regulating intracellular calcium and modulating the phosphoinositide balance. *Prog. Lipid Res.* 49:429–437.
  86. Kadampur, G., and E. M. Ross. 2013. Mammalian phospholipase C. *Annu. Rev. Physiol.* 75:127–154.
  87. Iino, M. 1999. Dynamic regulation of intracellular calcium signals through calcium release channels. *Mol. Cell. Biochem.* 190:185–190.
  88. Kalwa, H., and T. Michel. 2011. The MARCKS protein plays a critical role in phosphatidylinositol 4,5-bisphosphate metabolism and directed cell movement in vascular endothelial cells. *J. Biol. Chem.* 286:2320–2330.
  89. Smith, B. A., S. B. Padrick, ..., J. Gelles. 2013. Three-color single molecule imaging shows WASP detachment from Arp2/3 complex triggers actin filament branch formation. *eLife*. 2:e01008.
  90. King, C. C., E. M. Gardiner, ..., G. M. Bokoch. 2000. p21-activated kinase (PAK1) is phosphorylated and activated by 3-phosphoinositide-dependent kinase-1 (PDK1). *J. Biol. Chem.* 275:41201–41209.
  91. Yagi, M., A. Kantarci, ..., T. E. Van Dyke. 2009. PDK1 regulates chemotaxis in human neutrophils. *J. Dent. Res.* 88:1119–1124.
  92. Kamimura, Y., and P. N. Devreotes. 2010. Phosphoinositide-dependent protein kinase (PDK) activity regulates phosphatidylinositol 3,4,5-trisphosphate-dependent and -independent protein kinase B activation and chemotaxis. *J. Biol. Chem.* 285:7938–7946.
  93. Alessi, D. R., S. R. James, ..., P. Cohen. 1997. Characterization of a 3-phosphoinositide-dependent protein kinase which phosphorylates and activates protein kinase Balpha. *Curr. Biol.* 7:261–269.
  94. Chin, Y. R., and A. Toker. 2010. The actin-bundling protein palladin is an Akt1-specific substrate that regulates breast cancer cell migration. *Mol. Cell.* 38:333–344.
  95. Enomoto, A., H. Murakami, ..., M. Takahashi. 2005. Akt/PKB regulates actin organization and cell motility via Girdin/APE. *Dev. Cell.* 9:389–402.
  96. Irie, H. Y., R. V. Pearline, ..., J. S. Brugge. 2005. Distinct roles of Akt1 and Akt2 in regulating cell migration and epithelial-mesenchymal transition. *J. Cell Biol.* 171:1023–1034.
  97. Zimmermann, S., and K. Moelling. 1999. Phosphorylation and regulation of Raf by Akt (protein kinase B). *Science.* 286:1741–1744.
  98. Song, K., H. Wang, ..., D. Danielpour. 2006. Novel roles of Akt and mTOR in suppressing TGF-beta/ALK5-mediated Smad3 activation. *EMBO J.* 25:58–69.
  99. Burke, J. E., O. Perisic, ..., R. L. Williams. 2012. Oncogenic mutations mimic and enhance dynamic events in the natural activation of phosphoinositide 3-kinase p110 $\alpha$  (PIK3CA). *Proc. Natl. Acad. Sci. USA.* 109:15259–15264.
  100. Vadas, O., J. E. Burke, ..., R. L. Williams. 2011. Structural basis for activation and inhibition of class I phosphoinositide 3-kinases. *Sci. Signal.* 4:re2.
  101. Golebiewska, U., and S. Scarlata. 2008. Galphaq binds two effectors separately in cells: evidence for predetermined signaling pathways. *Biophys. J.* 95:2575–2582.
  102. Ballou, L. M., H. Y. Lin, ..., R. Z. Lin. 2003. Activated G alpha q inhibits p110 alpha phosphatidylinositol 3-kinase and Akt. *J. Biol. Chem.* 278:23472–23479.
  103. Kim, M. S., S. M. Pinto, ..., A. Pandey. 2014. A draft map of the human proteome. *Nature.* 509:575–581.
  104. Martens, L., P. Van Damme, ..., K. Gevaert. 2005. The human platelet proteome mapped by peptide-centric proteomics: a functional protein profile. *Proteomics.* 5:3193–3204.
  105. Milo, R. 2013. What is the total number of protein molecules per cell volume? A call to rethink some published values. *BioEssays.* 35:1050–1055.
  106. Sarpel, G., A. N. Barr, ..., A. Omachi. 1982. Erythrocyte phosphate content in Huntington's disease. *Neurosci. Lett.* 31:91–96.
  107. Ferrell, J. E., Jr., and W. H. Huestis. 1984. Phosphoinositide metabolism and the morphology of human erythrocytes. *J. Cell Biol.* 98:1992–1998.
  108. Hagelberg, C., and D. Allan. 1990. Restricted diffusion of integral membrane proteins and polyphosphoinositides leads to their depletion in microvesicles released from human erythrocytes. *Biochem. J.* 271:831–834.
  109. Lodish, H., A. Berk, ..., J. Darnell. 2000. *Molecular Cell Biology*, 4th ed. W. H. Freeman, New York.

110. Ryschon, T. W., D. L. Rosenstein, ..., R. S. Balaban. 1996. Relationship between skeletal muscle intracellular ionized magnesium and measurements of blood magnesium. *J. Lab. Clin. Med.* 127:207–213.
111. Garfinkel, L., R. A. Altschuld, and D. Garfinkel. 1986. Magnesium in cardiac energy metabolism. *J. Mol. Cell. Cardiol.* 18:1003–1013.
112. Maughan, D. 1983. Diffusible magnesium in frog skeletal muscle cells. *Biophys. J.* 43:75–80.
113. Parekh, A. B. 2008. Ca<sup>2+</sup> microdomains near plasma membrane Ca<sup>2+</sup> channels: impact on cell function. *J. Physiol.* 586:3043–3054.
114. Neher, E. 1998. Usefulness and limitations of linear approximations to the understanding of Ca<sup>++</sup> signals. *Cell Calcium.* 24:345–357.
115. Egea-Jiménez, A. L., A. Pérez-Lara, ..., J. C. Gómez-Fernández. 2013. Phosphatidylinositol 4,5-bisphosphate decreases the concentration of Ca<sup>2+</sup>, phosphatidylserine and diacylglycerol required for protein kinase C  $\alpha$  to reach maximum activity. *PLoS One.* 8:e69041.

**Biophysical Journal, Volume 110**

**Supplemental Information**

**Regulation of PI3K by PKC and MARCKS: Single-Molecule Analysis of a Reconstituted Signaling Pathway**

**Brian P. Ziemba, John E. Burke, Glenn Masson, Roger L. Williams, and Joseph J. Falke**



**Biophysical Journal**

**Supporting Material**

**Regulation of PI3K by PKC and MARCKS: Single-Molecule Analysis of a Reconstituted Signaling Pathway**

Brian P. Ziemba,<sup>1,2</sup> John E. Burke,<sup>3</sup> Glenn Masson,<sup>3</sup> Roger L. Williams,<sup>3</sup> and Joseph J. Falke<sup>1,2,\*</sup>

<sup>1</sup>Molecular Biophysics Program and <sup>2</sup>Department of Chemistry and Biochemistry, University of Colorado, Boulder, Colorado; and <sup>3</sup>Medical Research Council Laboratory of Molecular Biology, Cambridge, United Kingdom

\*Correspondence: falke@colorado.edu

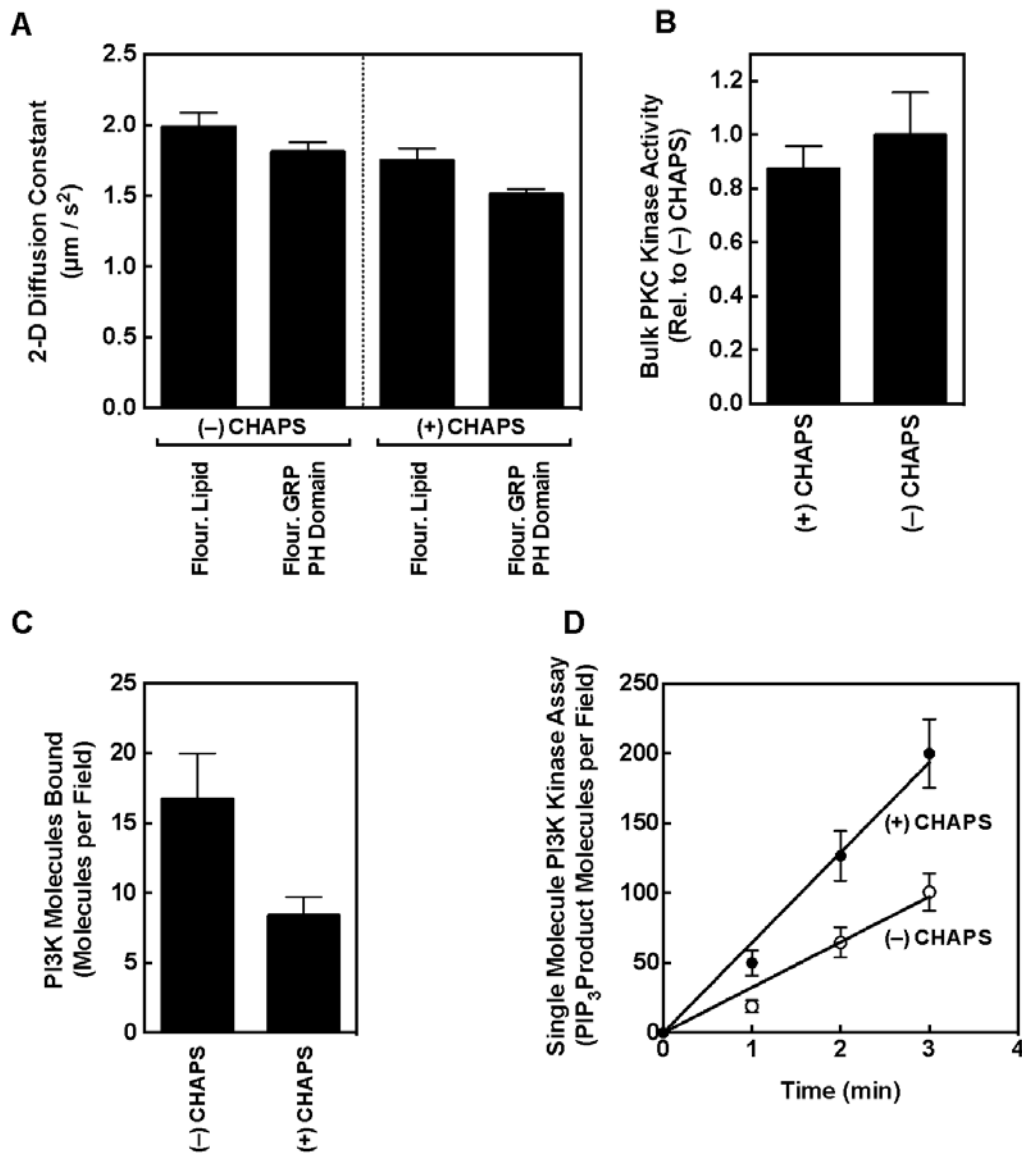

**(Supporting Material, Figure S1)** Control experiments to test effect of CHAPS on fluorescent lipid and protein diffusion and kinase activity. **(A)** CHAPS has no significant effect on the diffusion of the fluorescent lipid LRB-PE, but causes a small (<15%), reproducible ( $p < 0.05$ ) diffusional slowing of fluorescent GRP1 PH domain bound to PIP<sub>3</sub>. **(B)** CHAPS detergent has no significant effect on PKC $\alpha$  kinase activity. **(C)** CHAPS significantly decreases binding of PI3K $\alpha$  to the target membrane ( $p < 0.05$ ). **(D)** CHAPS significantly increases PI3K $\alpha$  lipid kinase activity ( $p < 0.01$ ). Single molecule TIRF was carried out at  $21.5 \pm 0.5$  °C on PE/PS/DAG/PIP<sub>3</sub>  $\pm$  200 ppb LRB-PE **(A)** or standard PE/PS/DAG/PIP<sub>2</sub> **(B-D)** supported bilayers as detailed in Fig. 4.

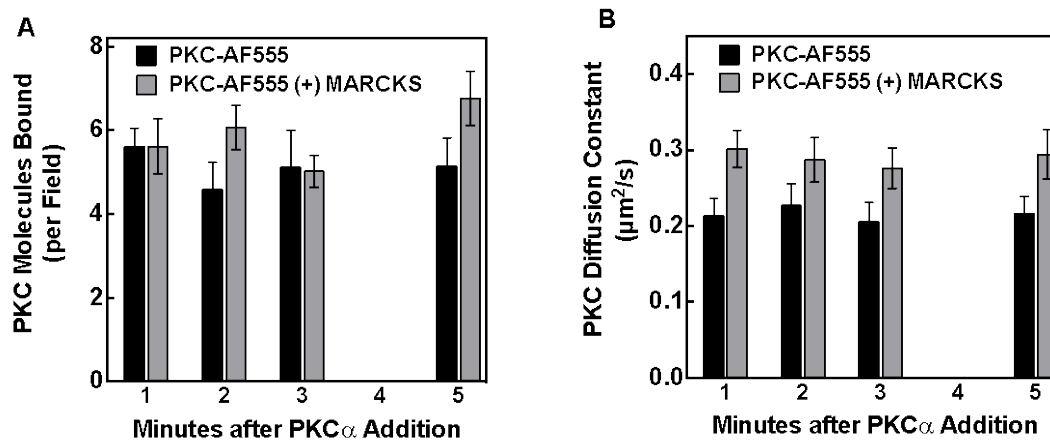

(Supporting Material, Figure S2) Control experiments testing the effect of MARCKSp on fluorescent Ca<sup>2+</sup>-PKC $\alpha$  binding and diffusion. (A) MARCKSp does not significantly affect Ca<sup>2+</sup>-PKC $\alpha$  binding to bilayers consistent with its high affinity for PS even in the absence of PIP<sub>2</sub> (1). (B) MARCKSp generates a small (<25%), reproducible ( $p < 0.005$ ) increase in the 2-D diffusion speed of membrane-bound Ca<sup>2+</sup>-PKC $\alpha$ , likely due to PIP<sub>2</sub> ligand sequestration which prevents C2 domain binding to PIP<sub>2</sub> as well as preventing the resulting diffusional slowing (2). Single molecule TIRF assay at  $21.5 \pm 0.5$  °C on standard PE/PS/DAG/PIP<sub>2</sub> supported bilayers as detailed in Fig. 4. In these experiments PKC $\alpha$  was employed at the standard total concentration (Table 1) used in other experiments, but at this concentration the density of membrane bound PKC $\alpha$  is too high to resolve single particles for counting and tracking. Thus, a mixture of fluorescent (0.005%) and dark, unlabeled PKC $\alpha$  (99.995%) was employed yielding the density of bound fluorescent PKC $\alpha$  indicated in (A).

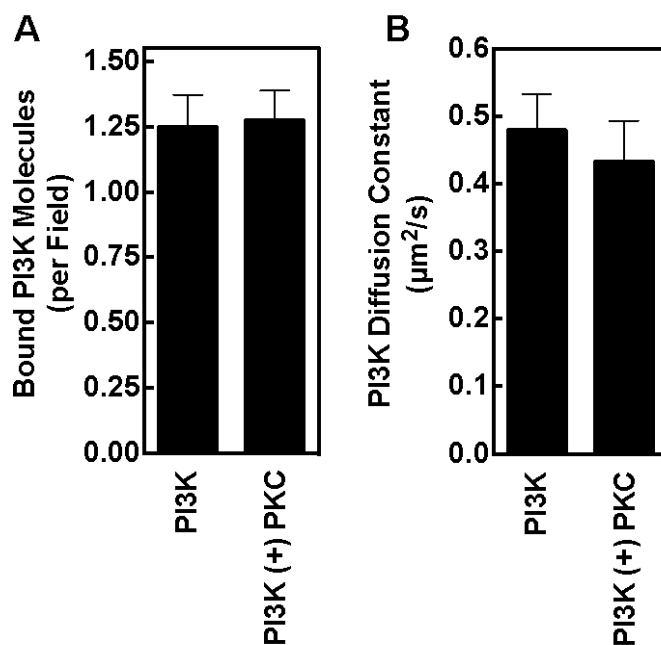

(Supporting Material, Figure S3) Control experiment testing for direct interaction between PKC and the PI3K membrane surface. PKC $\alpha$  is observed to have no significant effect on (A) the membrane binding or (B) the 2-D diffusion constant of fluorescent PI3K on standard PE/PS/DAG/PIP<sub>2</sub> supported bilayers as detailed in Fig. 4.

## REFERENCES

1. Manna, D., N. Bhardwaj, M. S. Vora, R. V. Stahelin, H. Lu, and W. Cho. 2008. Differential roles of phosphatidylserine, PtdIns(4,5)P<sub>2</sub>, and PtdIns(3,4,5)P<sub>3</sub> in plasma membrane targeting of C2 domains. Molecular dynamics simulation, membrane binding, and cell translocation studies of the PKC $\alpha$  C2 domain. *J Biol Chem* 283:26047-26058.
2. Ziemba, B. P., J. Li, K. E. Landgraf, J. D. Knight, G. A. Voth, and J. J. Falke. 2014. Single-molecule studies reveal a hidden key step in the activation mechanism of membrane-bound protein kinase C- $\alpha$ . *Biochemistry* 53:1697-1713.
